1 **Genome sequencing of 196 *Treponema pallidum* strains from six continents reveals**  
2 **additional variability in vaccine candidate genes and dominance of Nichols clade strains in**  
3 **Madagascar**

4  
5 Nicole A.P. Lieberman<sup>1</sup>, Michelle J. Lin<sup>1</sup>, Hong Xie<sup>1</sup>, Lasata Shrestha<sup>1</sup>, Tien Nguyen<sup>1</sup>, Meei-Li  
6 Huang<sup>1</sup>, Austin M. Haynes<sup>2</sup>, Emily Romeis<sup>2</sup>, Qian-Qiu Wang<sup>3,4</sup>, Rui-Li Zhang<sup>5</sup>, Cai-Xia Kou<sup>3,4</sup>,  
7 Giulia Ciccarese<sup>6</sup>, Ivano Dal Conte<sup>7</sup>, Marco Cusini<sup>8</sup>, Francesco Drago<sup>6</sup>, Shu-ichi Nakayama<sup>9</sup>,  
8 Kenichi Lee<sup>9</sup>, Makoto Ohnishi<sup>9</sup>, Kelika A. Konda<sup>10,11</sup>, Silver K. Vargas<sup>10</sup>, Maria Eguiluz<sup>10</sup>,  
9 Carlos F. Caceres<sup>10</sup>, Jeffrey D. Klausner<sup>11</sup>, Oriol Mitjà<sup>12,13</sup>, Anne Rompalo<sup>14</sup>, Fiona Mulcahy<sup>15</sup>,  
10 Edward W. Hook<sup>16</sup>, Sheila A. Lukehart<sup>2,17</sup>, Amanda M. Casto<sup>2,18</sup>, Pavitra Roychoudhury<sup>1,18</sup>,  
11 Frank DiMaio<sup>19</sup>, Lorenzo Giacani<sup>2,17</sup>, and Alexander L. Greninger<sup>1,18\*</sup>

12  
13 <sup>1</sup>Department of Laboratory Medicine and Pathology, University of Washington, Seattle,  
14 Washington, USA

15 <sup>2</sup>Department of Medicine, Division of Allergy and Infectious Diseases, University of  
16 Washington, Seattle, Washington, USA

17 <sup>3</sup>Institute of Dermatology, Chinese Academy of Medical Science & Peking Union Medical  
18 College, Beijing, China

19 <sup>4</sup>National Center for STD Control, China Centers for Disease Control and Prevention, Nanjing,  
20 China

21 <sup>5</sup>Department of Dermatology, The Second Affiliated Hospital of Nanjing Medical University,  
22 Nanjing, China

- 23 <sup>6</sup>Health Sciences Department, Section of Dermatology, San Martino University Hospital, Genoa,  
24 Italy
- 25 <sup>7</sup>STI Clinic, Infectious Diseases Unit, University of Turin, Turin, Italy
- 26 <sup>8</sup>Fondazione IRCCS Ca' Granda, Ospedale Maggiore Policlinico, Milan, Italy
- 27 <sup>9</sup>Department of Bacteriology I, National Institute of Infectious Diseases, Tokyo, Japan
- 28 <sup>10</sup>Unit of Health, Sexuality and Human Development and Laboratory of Sexual Health,  
29 Universidad Peruana Cayetano-Heredia, Lima, Peru
- 30 <sup>11</sup>Keck School of Medicine, University of Southern California, Los Angeles, California, USA
- 31 <sup>12</sup>Fight Aids and Infectious Diseases Foundation, Hospital Germans Trias i Pujol, Barcelona,  
32 Spain
- 33 <sup>13</sup>Lihir Medical Centre-International SOS, Lihir Island, Papua New Guinea
- 34 <sup>14</sup>Department of Infectious Diseases, Johns Hopkins Medical Institutions, Baltimore, Maryland,  
35 USA
- 36 <sup>15</sup>Department of Genito Urinary Medicine and Infectious Diseases, St James's Hospital, Dublin,  
37 Ireland
- 38 <sup>16</sup>Department of Medicine, University of Alabama, Birmingham, Birmingham, Alabama, USA
- 39 <sup>17</sup>Department of Global Health, University of Washington, Seattle, Washington, USA
- 40 <sup>18</sup>Vaccine and Infectious Disease Division, Fred Hutchinson Cancer Research Center, Seattle,  
41 Washington, USA
- 42 <sup>19</sup>Department of Biochemistry, University of Washington, Seattle, Washington, USA
- 43 \*corresponding author
- 44 Email: [agrening@uw.edu](mailto:agrening@uw.edu)

45 **Abstract**

46           In spite of its immutable susceptibility to penicillin, *Treponema pallidum* (*T. pallidum*)  
47 subsp. *pallidum* continues to cause millions of cases of syphilis each year worldwide, resulting in  
48 significant morbidity and mortality and underscoring the urgency of developing an effective  
49 vaccine to curtail the spread of the infection. Several technical challenges, including absence of  
50 an *in vitro* culture system until very recently, have hampered efforts to catalog the diversity of  
51 strains collected worldwide. Here, we provide near-complete genomes from 196 *T. pallidum*  
52 strains – including 191 *T. pallidum* subsp. *pallidum* – sequenced directly from patient samples  
53 collected from 8 countries and 6 continents. Maximum likelihood phylogeny revealed that  
54 samples from most sites were predominantly SS14 clade. However, 99% (84/85) of the samples  
55 from Madagascar formed two of the five distinct Nichols subclades. Although recombination  
56 was uncommon in the evolution of modern circulating strains, we found multiple putative  
57 recombination events between *T. pallidum* subsp. *pallidum* and subsp. *endemicum*, shaping the  
58 genomes of several subclades. Temporal analysis dated the most recent common ancestor of  
59 Nichols and SS14 clades to 1717 (95% HPD: 1543-1869), in agreement with other recent  
60 studies. Rates of SNP accumulation varied significantly among subclades, particularly among  
61 different Nichols subclades, and was associated in the Nichols A subclade with a C394F  
62 substitution in TP0380, a ERCC3-like DNA repair helicase. Our data highlight the role played by  
63 variation in genes encoding putative surface-exposed outer membrane proteins in defining  
64 separate lineages, and provide a critical resource for the design of broadly protective syphilis  
65 vaccines targeting surface antigens.

66

67 **Author Summary**

68           Each year, millions of new cases of venereal and congenital syphilis, caused by the  
69 bacterium *Treponema pallidum* (*T. pallidum*) subsp. *pallidum*, are diagnosed worldwide,  
70 resulting in significant morbidity and mortality. Alongside endemic circulation of syphilis in  
71 low-income countries, disease resurgence in high-income nations has underscored the need for a  
72 vaccine. Due to prior technological limitations in culturing and sequencing the organism, the  
73 extent of the genetic diversity within modern strains of *T. pallidum* subsp. *pallidum* remains  
74 poorly understood, hampering development of a broadly protective vaccine. In this study, we  
75 obtained 196 near-complete *T. pallidum* genomes directly from clinical swabs from eight  
76 countries across six continents. Of these, 191 were identified as *T. pallidum* subsp. *pallidum*,  
77 including 90 Nichols clade genomes. Bayesian analysis revealed a high degree of variance in  
78 mutation rate among subclades. Interestingly, a Nichols subclade with a particularly high  
79 mutation rate harbors a non-synonymous mutation in a putative DNA repair helicase. Coupling  
80 sequencing data with protein structure prediction, we identified multiple novel amino acid  
81 variants in several proteins previously identified as potential vaccine candidates. Our data help  
82 inform current efforts to develop a broadly protective syphilis vaccine.

83

84

## 85 **Introduction**

86 Syphilis, caused by the spirochete bacterium *Treponema pallidum* subspecies *pallidum*  
87 (TPA) remains endemic in low-income countries, where the majority of cases of this infection  
88 occurs. A surge in syphilis incidence, however, has been recorded as well in mid- and high-  
89 income nations, primarily among men who have sex with men (MSM) and persons living with  
90 HIV (PLHIV). The United States saw a 6.5-fold increase in primary and secondary syphilis cases  
91 between 2000 and 2019 (1,2), driven in large part by cases among MSM, although cases among  
92 heterosexual individuals are now rising rapidly as well. Globally, there were approximately 6  
93 million new cases per year among 15-49 year olds in 2016 (3). One million of these cases occur  
94 in pregnant women, of which 63% are in sub-Saharan Africa alone (4). Preventing cases among  
95 women of childbearing age is a critical worldwide public health initiative, as TPA can cross the  
96 placenta and cause spontaneous abortion and stillbirth. Maternal-fetal transmission of syphilis  
97 caused approximately 661,000 adverse birth outcomes globally in 2016 alone (5). In the United  
98 States, congenital syphilis is also rising, from 9.2 per 100,000 live births in 2013 to 48.5 per  
99 100,000 live births in 2019, more than a five-fold increase (2).

100 Given rising infection rates, increasing difficulties in procuring benzathine penicillin G  
101 (BPG) for treatment (6), and widespread *T. pallidum* resistance to azithromycin (7–9) which is  
102 no longer a viable alternative to BPG, the development of a vaccine against syphilis has become  
103 a public health priority. To this end, the syphilis spirochete poses a particular challenge. In  
104 contrast to other gram-negative bacteria, TPA has a remarkably low surface density of integral  
105 outer membrane proteins (OMPs) (10,11) and uses phase variation (random ON-OFF switching  
106 of expression) to further vary its overall surface antigenic profile (12,13). In parallel, this  
107 pathogen has evolved a highly efficient gene conversion-based system able to generate millions

108 of variants of the putative surface-exposed loops of the TprK OMP, thus creating an ever-  
109 changing target for the host defenses, which fosters immune evasion, pathogen persistence, and  
110 re-infection (14–16). Furthermore, TPA cannot be cultured in axenic culture, instead requiring  
111 propagation in rabbit testes or, more recently, in co-culture with rabbit epithelial cells (17). This  
112 has further hampered efforts to sequence clinical specimens to catalog regions of conservation  
113 and diversity, particularly of the OMPs, which is critical for development of an effective vaccine.  
114 As of this writing, consensus sequences of only 67 TPA strains have been deposited in INSDC  
115 databases, and of these not more than 53 were recovered directly (or following low passage  
116 rabbit culture) from clinical specimens. Additional data exist within the Sequence Read Archive  
117 (SRA) for up to 600-800 samples annotated as TPA but, without extensive manual curation and  
118 reliable assembly pipelines, high-quality data contained within the SRA remain inaccessible to  
119 most users. To inform vaccine development efforts, we generated high quality (<1% ambiguous  
120 or missing data) near-complete genomes from 196 *T. pallidum* genomes using hybrid capture,  
121 enabling direct determination of sequences from clinical specimens without the need for  
122 enrichment by culture in rabbits or *in vitro*. These newly available genomes were analyzed to  
123 unveil diversity in potential TPA vaccine targets in combination with *in silico* protein folding  
124 technology. Our work broadens our understanding of the molecular underpinnings of TPA, and  
125 serve as a resource for developing a broadly protective vaccine effective against syphilis.

126

## 127 **Results**

### 128 **Nichols clade strains are predominant in Madagascar**

129 As part of ongoing efforts to catalog global *T. pallidum* genomic diversity, we received  
130 samples containing *T. pallidum* genomic DNA recovered from primary or secondary lesions. We

131 attempted whole genome sequencing on those with > 100 copies of *tp0574* per 17.5  $\mu$ L genomic  
 132 DNA and obtained 196 high quality genomes consisting of <1% ambiguities using a custom  
 133 hybridization capture panel to enrich for *T. pallidum* DNA followed by processing through a  
 134 custom bioinformatic pipeline for consensus genome calling involving both de novo assembly  
 135 and reference mapping to the SS14 reference genome (NC\_021508.1). Summary demographic  
 136 characteristics for all samples, including 191 TPA, four *T. pallidum* subsp. *endemicum* (TEN),  
 137 and one *T. pallidum* subsp. *pertenue* (TPE) used in this study are presented in Table 1. Samples  
 138 were collected between 1998 and 2020 from 8 countries (Peru, Ireland, USA, Papua New  
 139 Guinea, Madagascar, Italy, Japan, and China) across 6 continents. Median coverage of the  
 140 reference genome by trimmed, deduplicated reads was 76.8x (range 16.5 - 1293.4), with a  
 141 minimum of 6 reads required to unambiguously call a base. Median input genomes, as  
 142 determined by *tp0574* qRT-PCR, for successful genome recovery was 4,319 copies (range 101 –  
 143 304,484) (Supporting Information 1 – Sample Statistics). The median number of ambiguities in  
 144 the finished genomes prior to masking was 49 (range 0-10,753).

145

146 **Table 1: Demographic information of samples sequenced in this study**

| Country          | Year(s) of Collection | Number of Samples | Sex (n)   |           |            | Stage (n) |           |            | Previous Study |
|------------------|-----------------------|-------------------|-----------|-----------|------------|-----------|-----------|------------|----------------|
|                  |                       |                   | Male      | Female    | Unknown    | Primary   | Secondary | Unknown    |                |
| Peru             | 2019                  | 9                 | 5         | 0         | 4          | 5         | 0         | 4          | n/a            |
| Ireland          | 2002                  | 11                | 0         | 0         | 11         | 0         | 0         | 11         | (18–20)        |
| USA              | 1998-2002             | 15                | 11        | 3         | 1          | 14        | 1         | 0          | (19,20)        |
| Papua New Guinea | 2019                  | 1                 | 0         | 0         | 1          | 0         | 0         | 1          | n/a            |
| Madagascar       | 2000-2007             | 85                | 0         | 0         | 85         | 10        | 16        | 59         | (20–22)        |
| Italy            | 2017                  | 10                | 10        | 0         | 0          | 10        | 0         | 0          | n/a            |
| Japan            | 2019-2020             | 57                | 34        | 22        | 1          | 0         | 0         | 57         | n/a            |
| China            | 2018                  | 8                 | 0         | 0         | 8          | 0         | 0         | 8          | n/a            |
| <b>TOTAL</b>     | <b>1998-2020</b>      | <b>196</b>        | <b>60</b> | <b>25</b> | <b>111</b> | <b>39</b> | <b>17</b> | <b>140</b> |                |

147

148           Following the assembly of the 196 genomes, we combined our strains with an additional  
149 55 publicly available consensus genomes, including five TPE, two TEN, 11 TPA laboratory  
150 isolates highly passaged in rabbit, and 37 direct clinical specimens/low passage rabbit TPA  
151 strains. Due to differences in library preparation expected to affect performance of our assembly  
152 pipeline, we chose not to reassemble genomes that did not have an available consensus sequence.  
153 All genomes were masked at the intra-rRNA tRNA-Ala and tRNA-Ile and highly repetitive *arp*  
154 and *tp0470* genes for which short read Illumina sequencing could not resolve position or relative  
155 length. Genomes were further masked at all paralogous *tpr* genes prior to recombination masking  
156 by Gubbins (23).

157           The maximum-likelihood phylogenetic tree shown in Figure 1 (and in tabular format in  
158 Supporting Information 1 – Sample Metadata) is defined by approximately 130-150 non-  
159 recombining SNPs separating any two Nichols and SS14 tips and approximately 1,200-1,450  
160 SNPs separating any two TPA and TPE or TEN tips. It recapitulates several features seen in  
161 previous phylogenies of *T. pallidum*. Notably, it includes a SS14 Omega node that contains  
162 nearly all SS14 clade samples, as well as tight geographic clustering of samples predominantly  
163 collected in China and Japan (24) and characterized by uniform azithromycin resistance caused  
164 by the A2058G mutation in the 23S rRNA allele (Figure 1A-C; SS14 Omega – East Asia node).  
165 None of these samples was resistant via the A2059G allele. We also observed genotypic  
166 azithromycin resistance in geographically diverse samples in both the SS14 and Nichols clades,  
167 further supporting the hypothesis that this mutation arises spontaneously (24).

168           The most striking feature of our *T. pallidum* phylogeny is the extensive circulation of  
169 strains belonging to the Nichols clade in Madagascar. All but one of the 85 Madagascar strains  
170 belonged to one of two Nichols subclades, A and B. The former consists of only Madagascar



171 strains except for a single strain from Cuba, and the latter containing only Madagascar samples.  
172 Except for an A2059G 23S rRNA mutation (25) observed in one sample, all Madagascar Nichols  
173 strains were azithromycin sensitive.

174 In addition to Nichols subclades A and B primarily from Madagascar, three additional  
175 distinct subclades were observed, containing samples collected throughout the world. The  
176 Nichols C subclade shares a common ancestor with the Nichols B subclade and is uniformly  
177 azithromycin resistant, in contrast to most other Nichols clade samples. Both Nichols D (which  
178 contains all laboratory strains) and Nichols E subclades are more distantly related to the  
179 Madagascar samples in Nichols A and B. The Nichols E subclade includes two previously  
180 reported samples from France as well as two newly sequenced samples from Japan and Italy.  
181 Interestingly, both the Japanese and Italian patients whose samples are included in this subclade  
182 report their sexual orientation as MSM; one French sample, CW59, was collected from an anal  
183 smear. Although this is hardly conclusive, the appearance of distinct TPA clades circulating  
184 among MSM individuals has recently been documented in Japan (26), suggesting that this  
185 phenomenon may be occurring worldwide.

186 In addition to the unexpected number of Nichols clade samples, we were also surprised to  
187 observe two samples from Maryland that clustered with the very distant SS14 clade genome,  
188 MexicoA, originally collected in 1953 from a male living in Mexico. These strains, MD06 and  
189 MD18B, diverge from the MexicoA strain by 33 and 24 non-recombining SNPs, respectively;  
190 from SS14 Omega strains by about 45 SNPs; and Nichols clade strains by about 150 SNPs. The  
191 MexicoA strain is unique in that it shares signatures of both syphilis and yaws organisms in  
192 several virulence factors (27,28). To our knowledge, clinical specimens clustering with the  
193 MexicoA strain have not previously been reported. Although the MD18B and MD06 samples

194 were collected in 1998 and 2002, respectively, and little demographic information for the  
195 samples exists, this is further evidence that our definitions of subspecies of *T. pallidum* may need  
196 periodic revisiting.

197 We also found that four Japanese samples that were clinically diagnosed as syphilis but,  
198 based on our whole genome analysis, appear to be part of the TEN subspecies, sharing an  
199 ancestor with the canonical TEN genomes IraqB and BosniaA. The observation of TEN samples  
200 following a syphilis diagnosis has been previously reported in Japan (29), Cuba (30), and France  
201 (presumed to have been contracted in Pakistan) (31). While both the previously discovered and  
202 new Japanese TEN samples are resistant to azithromycin via the canonical mutation in the 23S  
203 rRNA alleles, neither the Cuban nor French samples are resistant. Furthermore, three of the four  
204 samples reported herein were collected from individuals with diverse travel histories (China,  
205 Japan, and the Philippines), suggesting that a sexually transmitted TEN outbreak may be even  
206 more widespread than previously suspected.

207 As a mechanism to begin cataloging diversity of several genes known to be polyallelic,  
208 we also examined the multi-locus sequence type (MLST) types (32) of all TPA samples using  
209 whole genome sequence as well as the combined MLST. Figure 1D highlights the six most  
210 common MLST at each locus for TPA samples and whether the overall subtype had been  
211 previously reported. Complete MLST data can be found in Supporting Information 1. Across all  
212 238 TPA samples, we found a total of 15 unique complete *tp0136* sequences, including six not  
213 previously reported in the MLST database, which contains 26 alleles. Seventeen unique *tp0548*  
214 sequences were found, including seven novel sequences, relative to 58 known alleles. All five  
215 observed *tp0705* alleles had been previously reported. In total, excluding the 13 samples that  
216 were indeterminate at any of the three loci, we found a total of 40 unique haplotypes, including

217 22 not previously reported in the MLST database. Overall, 88 of 225 *T. pallidum* subsp. *pallidum*  
218 samples had a novel overall haplotype, including at least one sample from each country from  
219 which samples were obtained, and all 76 (100%) from Madagascar, underscoring the importance  
220 of wide geographic sampling to catalog the diversity of TPA strains.

221

222 **Putative recombination shapes modern *T. pallidum* subsp. *pallidum* genomes but remains a**  
223 **rare event**

224 Although *T. pallidum* does not have any known plasmids or infecting phages,  
225 recombination has nonetheless been shown to be an important mechanism by which genetic  
226 diversity may be generated in this pathogen (27,33,34). In particular, the *tpr* family of paralogs is  
227 thought to have arisen through gene duplication (28,35); for this reason, all *tpr* genes have been  
228 masked for all analyses in this study. Figure 2A shows the comparison of ML tree topology  
229 between genomes that have been recombination masked (left) or unmasked (right) (with tip order  
230 included in Supporting Information 2). Although no samples were classified to different  
231 subclades when recombinant loci were not masked, the overall tree topology was altered.  
232 Notably, the SS14 Omega node had more distinct subclades in the absence of recombination  
233 masking, suggesting that much of the diversity within SS14 Omega is due to recombination  
234 rather than mutation. Furthermore, the Nichols B subclade of Madagascar samples becomes the  
235 outgroup within the Nichols clade in the absence of recombination masking.

236 The method of recombination detection we employed relies on identification of an  
237 increased density of SNPs per sliding window throughout the clonal frame rather than  
238 identification of a discrete donor for each putative recombination event. Although previous  
239 analyses have found more recombination in the Nichols clade than SS14 (33), our use of more

240 than 90 clinical specimens belonging to multiple Nichols subclades, albeit with a geographic  
241 bias, likely provides a more complete picture of the evolutionary processes that shaped the  
242 Nichols clade. In spite of the number of samples examined, recombination remained a rare event  
243 in Tpr-masked genomes. Of the 474 nodes on the ML tree, including 238 tips and 236 internal  
244 nodes, only 27 branches with recombination were detected. Sixteen of these were on internal  
245 nodes and 11 on extant. Of the extant recombination events, four were detected in the 101  
246 Nichols clade samples, and seven of 137 in the SS14 clade samples, suggesting no clade-specific  
247 differences in recombination ( $p=0.7633$ , Fisher's Exact test).

248 Figure 2B highlights the positions of identified recombinant regions in the aligned  
249 genomes, with grey blocks corresponding to recombination that occurred during the separation  
250 of SS14 and Nichols clades, and colored blocks corresponding to recombination events that  
251 occurred during the evolution of individual subclades. The grey and red striped block represents  
252 a second recombination event in the SS14 Mexico clade that occurred in the same region as the  
253 ancestral recombination. As has been previously reported (33,36), many of the identified  
254 recombinant regions correspond to the most diverse genes in *T. pallidum*, such as *tp0136*, *tp0326*  
255 (*BamA*), and *tp0515* (*LptD*) (Supporting Information 2). Notably, many of the ORFs identified as  
256 recombinant encode proteins that are predicted to be at least partially surface exposed, and  
257 therefore the increased SNP density may represent either bona fide recombination or selective  
258 pressure of the host immune system on non-recombinant genes.

259 Recombination events specific to each subclade shown in Figure 2B were examined, with  
260 representative data in Figure 2C-F for SS14 Mexico, Nichols A, Nichols B, and Nichols E  
261 subclades, respectively. Windows of approximately 60 bases of the alignments of putative  
262 recombinant regions are shown, and include additional *T. pallidum* species members TPE, TEN,

263 and the *T. pallidum* Fribourg-Blanc treponeme, recently proposed to be reclassified as a TPE  
264 strain, due to its genetic similarity to other yaws strains (37), with non-identical nucleotides  
265 highlighted. Interestingly, several of the identified recombinant loci, including Block G in SS14  
266 Mexico, Block F in Nichols A, and Blocks E and L in Nichols E, have sequences identical to  
267 those found in all 6 TEN genomes included in Figure 1. TEN or TPE sequences have been found  
268 previously in several Nichols clade samples, suggesting prior recombination (33,36). However,  
269 our markedly extended phylogeny of the Nichols clade suggests that recombination between  
270 TPA and TEN has independently occurred on multiple occasions. This demonstrates that inter-  
271 subspecies recombination continues to play an important role in the diversification of *T. pallidum*  
272 subspecies.

273

#### 274 ***T. pallidum* subsp. *pallidum* subclades have different rates of SNP accumulation**

275 The evolutionary history of TPA has been a point of considerable debate in recent years,  
276 particularly in light of new evidence that could not exclude the presence of TPA in Northern  
277 Europe in the late 15<sup>th</sup> century, casting doubt on the popular theory that venereal syphilis was  
278 introduced to Europe by the returning Columbian expeditions (36). In order to determine the date  
279 of the most recent common ancestor (MRCA) of the samples included in our study, we first  
280 analyzed the temporal signal present among TPA strains by regressing the root-to-tip distances in  
281 the SNP-only maximum-likelihood tree (Figure 3A). The left panel shows this calculation  
282 performed on a tree that included 11 highly passaged laboratory strains (eight in Nichols clade  
283 and three in SS14 clade), identified by open circles, while the right panel is based on a tree that  
284 excluded laboratory strains. Notably, the negative slope seen for the Nichols clade appears to be  
285 due to the presence of laboratory strains. This is consistent with accelerated accumulation of

286 SNPs during routine passage of the laboratory strains for decades between collection and  
287 sequencing. Therefore, laboratory strains were excluded from further dating analysis.

288 We were curious as to why the Pearson correlation coefficients of the SS14 and Nichols  
289 clades (0.200 and 0.023, respectively) were so poor even in the absence of laboratory strains, and  
290 hypothesized that this may be due to differences inherent to the polyphyletic structure of both  
291 clades. We tested this by plotting the residuals of the regression by subclade and found  
292 significant differences between groups (Figure 3B,  $p < 2e^{-16}$ , ANOVA), suggesting that rates of  
293 SNP accumulation may differ across the TPA phylogeny.

294 Therefore, we proceeded to Bayesian ancestral reconstruction and dating of clinical  
295 specimens by BEAST 2 (38), using an uncorrelated relaxed clock with a starting rate of  $3.6 \times 10^{-4}$   
296 (24,39) as a prior model to account for differences in rates of mutation in different branches of  
297 the tree. Figure 3C shows the dated Bayesian phylogeny, with branches colored to reflect the rate  
298 of SNP accumulation. Black nodes have a posterior probability of  $>95\%$ . Consistent with  
299 previous studies (24,36,39), we dated the MRCA of TPA to 1717 (95% HPD 1543-1869), the  
300 Nichols clade to 1893 (1839-1940), and the SS14 clade to 1921 (1868-1964), and found that the  
301 rates of SNP accumulation on branches with  $>95\%$  posterior probability ranged between 0.2 and  
302 0.73 fixed SNPs/year. The inset figure shows the mean rates of diversification on branches with  
303  $>95\%$  posterior support for each tip, supporting our hypothesis that different subclades have  
304 different rates of mutation ( $p < 2e^{-16}$ , ANOVA).

305

306 **Host immune pressure drives mutation in the same putative antigens in SS14 and Nichols**  
307 **clades**

308 Observed differences in accumulation of SNPs among subclades may represent the  
309 effects of sampling bias or bottlenecks or may reflect differences in the underlying biology. To  
310 examine the functional differences that define each subclade (including loci identified as  
311 recombinant (Figure 2), we used augur (40) to reconstruct the ancestral nodes identified in the  
312 recombination-masked ML phylogeny, transferred ORF annotations from the TPA reference  
313 genome NC\_021508.1, and translated each ORF to detect coding changes. Figure 4A shows all  
314 nodes used for these analyses, with subclade tips collapsed for simplicity. All coding changes  
315 detected in Node 101 (SS14 clade ancestral) relative to Node 001 (Nichols clade ancestral,  
316 considered equivalent to the TPA root node for these calculations) are shown; data for all  
317 additional parent-child node pairs are included in Supporting Information 3. Forty-nine of 1002  
318 putative ORFs were altered between SS14 and Nichols ancestral nodes, with a total of 134 non-  
319 synonymous mutation events. We defined a mutation event as a single amino acid change,  
320 insertion/deletion, or frameshift. We did not separately include the effects of putative  
321 recombination events because we did not attempt to formally characterize recombination donors,  
322 and therefore could not disentangle the effects of recombination from selective pressure driving  
323 increased mutation.

324 We next attempted to define functional changes between the SS14 and Nichols clades by  
325 examining overrepresentation of altered loci in categories annotated by structural similarity (41).  
326 We used the annotation of the Protein Data Bank (PDB) structure of the highest scoring model,  
327 with a confidence cutoff of 75%, allowing 798 coding sequences (CDSs) to be assigned to a total  
328 of 62 unique PDB categories. We then performed Fisher's exact tests to test for  
329 overrepresentation of altered proteins in each category. For SS14 vs Nichols ancestral nodes (101  
330 vs 001, Supplementary Figure 1), we only found significant overrepresentation in a single

331 category, “Signaling Protein”, with 3 (*tp0073*, *tp0640*, and *tp0995*) loci out of the 16 in the  
332 category altered. However, because these annotations are by structural similarity rather than  
333 known function, it is likely that testing for overrepresentation of structural annotations does not  
334 fully capture the functional differences between any two clades.

335         Because functional annotation of *T. pallidum* proteins is still hampered by the absence of  
336 a reverse genetics system, we chose next to focus on alteration of proteins known or suspected to  
337 interact with the host immune system. We included proteins that reacted with pooled sera from  
338 individuals with known syphilis infection (42,43) or otherwise known to be surface-exposed  
339 (Supporting Information 3 - Antigens) and again performed overrepresentation tests (Figure 4B).  
340 Along branches with more than 10 altered proteins, only two nodes (N015, Nichols C, and N005,  
341 Nichols D Lab Strains) did not have significant p values ( $p < 0.05$ ) relative to their parent. When  
342 examining individual mutation events in nodes with more than four altered proteins, mutation in  
343 antigenic proteins represents more than 30% of the amino acid variability in more than half of  
344 nodes, and at least 10% in all nodes (Figure 4C). Antigenic proteins are enriched among proteins  
345 that become mutated relative to their parent node in multiple subclades, representing separate  
346 events (Figure 4D). Furthermore, among antigens that were mutated relative to the parent node in  
347 more than one subclade, none was exclusive to either the SS14 or Nichols clade. These data  
348 suggest that interaction with the host immune system drives a large proportion of the evolution  
349 of both major clades of this pathogen, either via individual SNPs or horizontal gene transfer.

350         However, although antigens are enriched for non-synonymous mutations relative to the  
351 rest of the proteome, mutation of non-antigenic proteins may make considerable contributions to  
352 *T. pallidum* pathogenicity and immune interaction. When examining proteins whose mutation  
353 was unique to a single clade (Figure 4D), we found a C394F mutation in the ERCC3-like DNA



354 repair helicase TP0380 (44) only in the Nichols A subclade, which had a much higher median  
355 rate of SNP accumulation than any other subclade (Figure 3C). It is plausible that mutation of  
356 this helicase compromises DNA repair and contributes to a more rapid rate of evolution within  
357 this clade.

358

### 359 **Predicted structural changes of putative surface proteins not limited to polymorphic** 360 **residues**

361 For any protein, multiple independent mutation events along several branches of the TPA  
362 phylogeny strongly suggest the protein is under selective pressure. Of the six proteins that  
363 undergo mutation along four or more of the 14 branches in the phylogeny (Figure 4D and  
364 Supporting Information 3 – Heatmap), five (TP0136, TP0326, TP0548, TP0966, and TP0967)  
365 are known to be antigenic. TP0326, TP0548, TP0966, and TP0967 are likely outer membrane  
366 proteins based on their homology to *N. gonorrhoeae* BamA (TP0326) and *E. coli* FadL (TP0548)  
367 and TolC (TP0966, TP0967) (45) and reviewed in (46). TP0136 is a lipoprotein that appears to  
368 be localized to the outer membrane, where it functions as a fibronectin- and laminin-binding  
369 adhesin (47–49). To date, recombinant TP0136 and TP0326 have been tested as potential  
370 vaccine candidates in rabbits, with TP0136 delaying ulceration but not providing full protection  
371 upon challenge (47), and TP0326 providing partial protection in some studies (50,51), while not  
372 protective in others (52). Although antigens harboring polymorphisms would not traditionally be  
373 considered viable vaccine candidates, the paucity of outer membrane proteins in *T. pallidum* (46)  
374 demands evaluation of imperfect candidates.

375 Accordingly, for the five most frequently mutated putative outer membrane antigens, we  
376 developed models that highlight the positions predicted to undergo the most structural change

377 upon mutation, including those at orthogonal sites. We first performed global alignments of  
378 sequence variants for each of the five proteins using hhpred (53–55) (Supplementary Figures 2-6,  
379 panel A, and Supporting Information 4). We then generated composite homology models of the  
380 SS14 variant using RosettaCM (56) guided by hhpred sequence alignment. Ribbon structures and  
381 surface contours with highlighted polymorphic residues of the SS14 variant are shown in  
382 Supplementary Figures 2-6, panels B and C, respectively. Then, the SS14 model was used as a  
383 template for predicting the structure of variants of other strains. We performed a global  
384 superposition of variant structures and computed an average per-atom displacement relative to  
385 the reference model (taking sequence changes into account, see Methods). The resulting per-  
386 atom deviations were then mapped onto the model of the SS14 variant, with blue representing  
387 regions of the lowest displacement from the SS14 model and red the highest (Supplementary  
388 Figures 2-6, panel D). This approach allowed detection of structural changes not simply at the  
389 site of the polymorphism, but also orthogonal changes due to disruption of hydrogen and other  
390 bonds. Furthermore, it allows “tuning” of the structural effect of a mutation on each atom, with  
391 the mutation of similar residues (such as leucine to isoleucine) resulting in less displacement of  
392 each atom than substitution of dissimilar residues (such as arginine to histidine). N terminal  
393 residues comprising predicted secretion sequences are not shown for TP0136 (48) or TP0326  
394 (57). Best estimates for Gram negative signal peptides were predicted by SignalP 5.0 (58) for  
395 TP0548, TP0966, and TP0967 SS14 variants and excluded from display.

396 In spite of slightly different approaches employed in their generation and our use of the  
397 SS14 variant rather than Nichols, our structural models for TP0326, TP0548, TP0966, and  
398 TP0967 generally agree with the models recently proposed by Hawley *et al.* (45). TP0326 is a  
399 large multidomain component of the  $\beta$ -barrel Assembly Complex (BAM) and includes a C-

400 terminal  $\beta$ -barrel. Consistent with previous studies (34,45,57,59), we found that extracellular  
401 loop (ECL)-4 and the serine-rich tract of ECL-7 contribute to much of the between-strain  
402 structural diversity (arrows and single arrowheads, respectively, Supplementary Figure 2B-D).  
403 We also found that the large ECL-3 (double arrowheads, Supplementary Figure 2B-D) had nine  
404 polymorphic residues, rendering the entire exposed surface of the protein variable due to strain-  
405 to-strain variation in ECLs, particularly 3, 4, and 7 (Supplementary Figure 2C-D).

406 In contrast to TP0326, the structure and function of which has been studied extensively,  
407 less is known about TP0548, a predicted homolog of the *E. coli* fatty acid transporter FadL. We  
408 predict the structure to be a 14-stranded  $\beta$ -barrel, with periplasmic C-terminal  $\alpha$ -helices,  
409 consistent with previous studies (45). Prediction of linear B cell epitopes (BCEs) using BepiPred  
410 2.0 (60) revealed that, depending on the as-yet unknown position of the cleavage of the N  
411 terminal signal sequence, up to four linear BCEs eight residues or longer are predicted to occur  
412 in invariant, extended host-facing loops at the N-terminus and ECL-2 (Supplementary Figure 3A,  
413 arrows in Supplementary Figure 3B show the relevant loops), rendering them potentially of use  
414 in a vaccine cocktail. Notably, the displacement seen in ECL-2, containing BCEs 3 and 4,  
415 (Supplementary Figure 3D, arrow) is most likely due to stochastic differences in predicting the  
416 conformation of the flexible loop rather than true structural variation.

417 Both TP0966 and TP0967 are predicted to be orthologs of the *E. coli* efflux pump TolC  
418 (45), and are predicted to have a tri-partite structure, with each monomer contributing four  $\beta$ -  
419 strands to  $\beta$ -barrel that spans the outer membrane with BCEs predicted within the ECLs (45).  
420 Supplementary Figures 4B and 5B highlight a single monomer for TP0966 and TP0967,  
421 respectively; both ECLs of TP0966, and ECL1 of TP0967, contain polymorphic residues that  
422 disrupt predicted linear B cell epitopes (Supplementary Figures 4A and 5A, Supplementary

423 Figures 4C and 5C, arrows). For both TP0966 and TP0967, the residues with the most  
424 displacement that disrupt the extracellular surface are not the polymorphic positions  
425 (Supplementary Figures 4D and 5D, arrows). Rather, in TP0966, the polymorphic charged  
426 residues in and adjacent to the ECLs may cause changes to electrostatic interactions that  
427 influence loop position. In TP0967, the length of the poly-glycine tract alters the position of  
428 ECL1. The likely result is disruption of the conformational epitopes formed by the surface loops  
429 in TP0966 and TP0967.

430 Finally, we generated a structural model of TP0136, and found it to adopt a 7-bladed  
431 beta-propeller fold in its N-terminal domain, followed by a relatively unstructured C-terminal  
432 domain (Supplementary Figure 6B). The beta-propeller structure is noteworthy as it is  
433 homologous to structures found in several eukaryotic integrins that mediate binding to the  
434 extracellular matrix (61), as well as to bacterial lectins (62). Several tracts of serine and lysine  
435 repeats are a unique structural feature of TP0136; the beta-propeller fold of TP0136 allows these  
436 intrinsically disordered regions to form unstructured loops between beta strands. Unsurprisingly,  
437 the surfaces that comprise the  $\beta$ -strands have some polymorphisms (Supplementary Figure 6B  
438 and C, boxed region) but they are not predicted to cause extensive structural displacement and  
439 disruption of the fold, as shown by primarily blue coloring in the boxed region of Supplementary  
440 Figure 6D.

441 Interestingly, the deletion in TP0136 that appears in 4 sequence variants (2, 5, 22, 23, and  
442 24, Supplementary Figure 6A, alignment position 161-192) and entirely removes the large  
443 flexible loop annotated by an arrow in Supplementary Figure 6B-D is not found in any ancestral  
444 node sequences (Figure 4), but arises independently in strains from multiple geographic  
445 locations, including Nichols clade strains from Madagascar and the United States (subclades A,

446 B, and D), and SS14 clade strains from Japan, Peru, and Ireland (subclades Omega – East Asia  
447 and SS14 Omega`), consistent with this genomic region being a hotspot for recombination  
448 (Figure 2).

449

## 450 **Discussion**

451 In recent years, *T. pallidum* genomics has been significantly advanced by projects aimed  
452 at studying the origin and spread of strains responsible for the modern syphilis pandemic  
453 (24,26,36,39,63), as well as the emergence of azithromycin resistance (24,26,63). Increasingly  
454 the challenge in *T. pallidum* genomics will be attaining complete genomic sequences from  
455 undersampled regions, associating genomic sequencing with spirochete biochemical functions,  
456 and gaining actionable insights into *T. pallidum* evolution that inform vaccine design.

457 With these goals, we generated 196 near-complete *T. pallidum* genomes from diverse  
458 locations, including three countries – Peru, Italy, and Madagascar – with no previous complete  
459 genomes publicly available. Peruvian samples (n=9) belonged exclusively to the SS14 Omega`  
460 subclade, which contains samples collected worldwide and corresponds to the largest SS14 sub-  
461 lineage in a recent analysis of SNPs in TPA strains (63). Eight of the ten Italian strains also  
462 belonged to the Omega` subclade.

463 The remaining two Italian strains, collected in Turin and Bologna, were of two distinct  
464 Nichols subclades, one of which clustered with three Japanese syphilis strains in Nichols  
465 subclade C, and the other clustered with samples of Japanese and French origin, forming the  
466 distantly related Nichols subclade E. Notably, none of the Japanese or Italian samples clustered  
467 with the Malagasy Nichols samples, which, but for a single Cuban strain in Nichols subclade A,  
468 formed two private subclades. Because the samples from Madagascar were collected between

469 2000-2007, it is unknown whether there has been introduction of additional lineages of TPA in  
470 the intervening years, or whether the two nearly private subclades are reflective of the currently  
471 circulating strains.

472 Sample collection date is also an important consideration to the interpretation of  
473 azithromycin resistance data. None of the strains collected in the USA between 1998 and 2002  
474 were resistant to azithromycin. However, this was prior to the detection of widespread  
475 azithromycin resistance in the United States (8); therefore, the lack of resistance detected in the  
476 strains sequenced for the present study should not be considered representative of the current  
477 status. Only one of the strains collected from Madagascar between 2000 and 2007 was resistant  
478 to azithromycin; no subsequent sampling has been performed, thus, no conclusions about  
479 azithromycin resistance in strains currently circulating in Madagascar can be drawn.

480 In our study, as in other recent global *T. pallidum subsp. pallidum* genomics initiatives  
481 (24,63), samples were collected and sequenced based on availability rather than representing an  
482 even distribution based on global burden of disease. The result of this is that, although we gained  
483 a broader picture of worldwide diversity, some regions (North America, western Europe, eastern  
484 Asia) continue to be overrepresented, while other regions (Africa – particularly Sub-Saharan  
485 Africa, which bears the largest share of cases worldwide – and South Asia and South America)  
486 are still vastly under-sampled. However, an important takeaway from our study as well as the  
487 recent paper from Beale *et al.* (63) is that the general understanding that SS14 represents the vast  
488 majority of circulating strains may require revisiting. Although the island nation of Madagascar  
489 is unlikely truly representative of the diversity of strains currently circulating in Sub-Saharan  
490 Africa, particularly because the samples are 15-20 years old, our finding that 99% of Malagasy  
491 strains belong to the Nichols clade, coupled with Beale *et al.*'s discovery of Nichols strains

492 circulating in Zimbabwe and South Africa (63) strongly suggests widespread circulation of  
493 Nichols clade TPA in Africa. Clearly, increased sampling must be a priority to enable  
494 understanding of syphilis epidemiology in Africa, and to ensure a vaccine covers strains  
495 circulating in the regions most hard hit by the modern pandemic.

496         Our temporal analysis generally agreed with previous estimates of mutation rate (39,63)  
497 in spite of the fact that we used a relaxed, rather than fixed, clock model to determine whether  
498 there were differences in the rate of mutation along different branches of the *T. pallidum* subsp.  
499 *pallidum* phylogeny, which could indicate either different selection pressures or underlying  
500 biological differences contributing to the phenotype. Indeed, we found significant differences in  
501 the rates of mutation among the subclades (Figure 3C). The Nichols A subclade was particularly  
502 interesting to us, given its high median rate of mutation along branches within the subclade with  
503 high posterior support. Notably, when we examined the non-synonymous mutations that defined  
504 the Nichols A subclade relative to its ancestral node, shared by Nichols subclades A, B, and C  
505 (Figure 4A/D), we found that one of the non-synonymous mutations found only within the  
506 Nichols A subclade was in TP0380, a putative ERCC3-like DNA repair helicase that interacts  
507 with DNA replication machinery by yeast two-hybrid analysis (41,44,64). Although the  
508 functional significance of the C394F mutation (C1181A in *tp0380*) is unknown, it is tempting to  
509 speculate that it may directly affect DNA repair. This hypothesis of a potential mutator  
510 phenotype in *T. pallidum* can now be examined *in vitro*, given the recent description of the first  
511 genetic transformation in *T. pallidum* (65). If TP0380 mutation is indeed responsible for the  
512 elevated rate of mutation seen within the Nichols A subclade, the implications for vaccine design  
513 may be significant.

514 By definition, an effective syphilis vaccine needs to protect against most strains  
515 circulating where the vaccine is administered. Our work further supports that the majority of  
516 non-synonymous mutations that define *T. pallidum* subsp. *pallidum* subclades are in proteins  
517 putatively located in the outer membrane, or known to react with serum from syphilis patients  
518 (Figure 4) (42,43). These data, along with recent structural modeling of *T. pallidum* outer  
519 membrane proteins showing that putative B cell epitopes are primarily found on the protein  
520 surface predicted to face the host (45), strongly suggest that immune pressure is the most  
521 important driver of mutation in *T. pallidum* subsp. *pallidum*. Indeed, our own structural  
522 modeling, which highlights regions with the highest structural displacement due to sequence  
523 variability, confirms that the regions with the highest displacement are frequently polyallelic  
524 (Supplementary Figures 2-6). Given the paucity of *T. pallidum* outer membrane proteins, and the  
525 extensive mutation of predicted epitopes, a multivalent vaccination strategy may engender a  
526 polyclonal humoral response capable of neutralizing a wider array of strains, a strategy currently  
527 being adopted in our laboratory.

528 Finally, an important caveat to these data is that, due to their extensive recombination and  
529 duplication, we excluded arguably the most important *T. pallidum* proteins that interact with the  
530 host immune system, the Tpr family (14,28). Although this approach has been used before to  
531 ensure an accurate phylogeny free from the confounding effects of recombination (24,63), as  
532 well as to prevent mistakes due to improper resolution of their repetitive elements during de  
533 novo assembly (39), an understanding of how the *tpr* genes evolve and influence host immunity  
534 is critical to developing an efficacious vaccine to *T. pallidum*. Accordingly, we are currently  
535 undertaking additional analyses of the Tpr family in these strains, including the hypervariable  
536 regions of TprK.



537           The data presented in this study represent a step forward toward developing a successful  
538 vaccine against syphilis. Alongside increased sequencing of strains from regions without  
539 extensive sampling, particularly Africa and South America, improved biophysical and  
540 computational methods are necessary to unequivocally determine which proteins are expressed  
541 on the surface of the bacterium during human infection. The new system to genetically engineer  
542 *T. pallidum* (65) will undoubtedly aid these studies, as well as allow the development of strains  
543 to test vaccine candidates in animal experiments. Finally, a successful vaccine must not only be  
544 efficacious against all circulating strains, but must also be sufficiently low cost and robust to  
545 ambient temperatures to allow distribution in the developing world, which is currently bearing  
546 the burden of the modern pandemic.

547

## 548 **Methods**

549 **Ethics Statement:** All human samples were collected and deidentified following protocols  
550 established at each institution. Samples from Ireland, Madagascar, and USA have been  
551 previously published (18–22). IRB protocol numbers for collection of the remaining samples are  
552 as follows: China: Nanjing Medical University, 2016-050; Italy: Universities of Turin and  
553 Genoa, PR033REG2016, University of Bologna, 2103/2016; Japan: National Institute of  
554 Infectious Diseases, 508 and 705; Peru: University of Southern California, HS-21-00353; Papua  
555 New Guinea, Lihir Medical Center, Medical Research Advisory Committee of the PNG NDOH  
556 No: 17.19. Sequencing of deidentified strains was covered by the University of Washington  
557 Institutional Review Board (IRB) protocol number STUDY00000885.

558 **Library Preparation:** Samples were collected and DNA extracted using standard protocols (66).  
559 Treponemal burden was assessed by quantitative PCR (qPCR) for *TP47* multiplexed with human

560  $\beta$ -globin, using primer sequences *TP47-F*: 5'-CAAGTACGAGGGGAACATCGAT, *TP47-R*: 5':  
561 TGATCGCTGACAAGCTTAGG, *TP47-probe*: 5'-6FAM-  
562 CGGAGACTCTGATGGATGCTGCAGTT-NFQMGB. Pre-capture libraries were prepared  
563 from up to 100 ng input genomic DNA using the Kapa Hyperplus kit (Roche), using a  
564 fragmentation time of 8 minutes and standard-chemistry end repair/A-tailing, then ligated to  
565 TruSeq adapters (Illumina). Adapter-ligated samples were cleaned with 0.8x Ampure beads  
566 (Beckman Coulter) and amplified with barcoded primers for 14-16 cycles, followed by another  
567 0.8x Ampure purification.

568 ***T. pallidum* capture:** Capture of *T. pallidum* genomes was performed according to Integrated  
569 DNA Technology's (IDT's) xGen Hybridization Capture protocol. Briefly, pools of 3-4 libraries  
570 were created by grouping samples with similar treponemal load for a total of 500 ng DNA, and  
571 Human Cot 1 DNA and TruSeq blocking oligos (IDT) added prior to vacuum drying. The  
572 hybridization master mix, containing biotinylated probes from a custom IDT oPool tiling across  
573 the NC\_010741.1 reference genome, was then added overnight (>16 hr) at 65C. The following  
574 day, streptavidin beads were added to the capture reaction, followed by extensive washing, 14-16  
575 cycles of post-capture amplification, and purification with 0.8x Ampure beads. Pool  
576 concentration was determined by Qubit assay (Thermo Fisher) and size verified by TapeStation  
577 (Agilent). Libraries were sequenced on a 2x150 paired end run on a HiSeqX.

578 **Fastq processing:** Fastqs were processed and genomes assembled using our custom pipeline,  
579 available at [https://github.com/greninger-lab/Tpallidum\\_WGS](https://github.com/greninger-lab/Tpallidum_WGS). Paired end reads were adapter-  
580 and quality-trimmed by Trimmomatic 0.35 (67), using a 4 base sliding window with average  
581 quality of 15 and a minimum length of 20, retaining only paired reads. Trimmed reads were then  
582 filtered with bbdduk v38.86 (68) in two separate steps. First, reads were filtered very stringently,

583 allowing removal of contaminating non-*T. pallidum* reads, against a reference containing the two  
584 rRNA loci, with a 100 bp 5' and 3' flank, from each of five reference *T. pallidum* genomes  
585 (NC\_021508.1 (*T. pallidum* subsp. *pallidum* strain SS14), NC\_016842.1 (*T. pallidum* subsp.  
586 *pertenue* strain SamoaD), NC\_016843.1 (*T. pallidum* subsp. *pertenue* strain Gauthier),  
587 NC\_021179 (*T. pallidum* strain Fribourg-Blanc treponeme), NZ\_CP034918.1 (*T. pallidum*  
588 subsp. *pallidum* strain CW65)). We used a kmer size of 31, a Hamming distance of 1, a  
589 minimum of 98% of kmers to match reference, and removal of both reads if either does not pass  
590 these criteria. Second, unmatched reads from the rRNA filtration step were then filtered against  
591 the complete reference genomes that had been masked with N at the rRNA loci, using a kmer  
592 size of 31 and a Hamming distance of 2. Matching reads from the two steps were concatenated  
593 and used for input for genome mapping and assembly.

594 **Genome assembly:** Filtered reads were mapped to the *T. pallidum* street 14 reference genome,  
595 NC\_021508.1, using Bowtie2 v2.4.1 (69) with default parameters and converted to bam with  
596 samtools v1.6 (70), followed by deduplication by MarkDuplicates in Picard v2.23.3 (71). Prior to  
597 *de novo* assembly, rRNA-stripped reads were filtered with bbduk (68) to remove repetitive  
598 regions of the genome, including the repeat regions of the *arp* and *TP0470* genes, as well as  
599 *tprC*, *tprD*, and the *tprEGF* and *tprIJ* loci, using a pseudo-kmer size of 45 and Hamming  
600 distance of 2. *De novo* assembly was performed using Unicycler v0.4.4 (72) using default  
601 settings, with rRNA- and repetitive region-stripped paired fastqs as input. Contigs longer than  
602 200 bp were then mapped back to NC\_021508.1 reference genome using bwa-mem 0.7.17-r1188  
603 (73) and a custom R script (74) used to generate a hybrid fasta merging contigs and filling gaps  
604 with the reference genome. Deduplicated reads were initially remapped to this hybrid using  
605 default Bowtie2 settings, local misalignments corrected with Pilon v1.23.0 (75), and a final

606 Bowtie2 remapping to the Pilon consensus used as input to a custom R script (74) to close gaps  
607 and generate a final consensus sequence, with each position called at a threshold of 50% of reads  
608 supporting a single base. A minimum of six reads were required to call bases; coverage lower  
609 than 6x was left ambiguous by calling “N”. All steps of genome generation were visualized and  
610 manually confirmed in Geneious Prime v2020.1.2 (76). Following consensus generation, the  
611 tRNA-Ile and tRNA-Ala sites that occur within the rRNA loci were masked to N due to short  
612 reads being unable to resolve the order of the sites. Consensus genomes were further masked at  
613 the *arp* and *tp0470* repeats and *tprK* variable regions prior to further analysis and deposition in  
614 the NCBI genome database.

615 **Phylogeny:** Consensus genomes that had been masked at the *arp* and *tp0470* repeats, intra-rRNA  
616 tRNAs, and *tprK* variable regions were further masked to N at all *tpr* genes, which are known to  
617 be recombinogenic (35). Masked genomes were aligned with MAFFT v7.271 (77) with a gap  
618 open penalty of 2.0 and an offset (gap extension penalty) of 0.123. Aligned genomes were  
619 recombination masked using 25 iterations of Gubbins v2.4.1 (23). Recombination masking was  
620 performed separately with and without *T. pallidum* subsp. *pertenue* and *T. pallidum* subsp.  
621 *endemicum* sequences as appropriate. Recombination masking was mapped back onto whole  
622 genome sequences and visualized using maskrc-svg v0.5 (78), and iqtree v2.0.3 (79) used to  
623 generate a whole genome maximum likelihood phylogeny using 1000 ultrafast bootstraps and  
624 automated selection of the best substitution model. A non-recombination-masked maximum  
625 likelihood tree was generated using the same parameters but with the raw MAFFT output.  
626 Sequences of *tp0136*, *tp0548*, and *tp0705* were extracted and batch queried using the PubMLST  
627 database ((32), accessed 01-22-2021).

628 **Bayesian Dating:** TempEst v1.5.3 (80) was used to calculate root-to-tip distances for the SNP-  
629 only maximum likelihood phylogeny calculated with or without *T. pallidum* subsp. *pallidum*  
630 laboratory strains, assuming one year uncertainty in strains with collection dates estimated.  
631 Regressions of distance vs sample date were performed per clade in R. Bayesian dating was  
632 performed in the BEAST2 suite (38) using the recombination masked SNP-only (n=600 sites)  
633 alignment of *T. pallidum* subsp. *pallidum*, excluding laboratory strains. Priors included a relaxed  
634 clock lognormal model with a starting rate of  $3.6 \times 10^{-4}$  (24,39), constant population size, and a  
635 GTR +gamma substitution model. Three separate runs, each with 100,000,000 MCMC cycles  
636 were performed and the first 10,000,000 cycles discarded as burn-in. All runs converged and  
637 were merged prior to calculation of the maximum clade credibility (MCC) tree.

638 **Ancestral node reconstruction:** Augur v10.1.1 (40) was first used to map all tips without  
639 recombination masking onto the whole genome phylogeny generated following recombination  
640 masking, ensuring appropriate ancestral relationships unconfounded by recombination, using the  
641 “refine” function. The “ancestral” function was next used with default settings to infer ancestral  
642 node sequences. Sequences of select nodes were aligned to reference NC\_021508.1 using  
643 MAFFT as above, and annotations of the reference transferred to ancestral node sequences in  
644 Geneious. Pairwise global alignments of protein sequences were performed in R using the  
645 Biostrings package (81), and analysis and statistical measurements performed in R using custom  
646 scripts.

647 **Antigens:** Antigens were manually curated based on being reactive against *T. pallidum* subsp.  
648 *pallidum* positive human sera in either of two previous studies (42,43) or, to control for low  
649 expression hampering detection by these in vitro methods, by being selected as likely surface  
650 proteins or lipoproteins based on extensive literature searches.

651 **Structural modeling:** Genomes were annotated using Prokka v1.14.6 (82), using the --proteins  
652 flag to force annotations to comply with NC\_021508.1. Translated coding sequences for vaccine-  
653 relevant genes were extracted with a custom R script. Sequences containing ambiguities or  
654 truncations likely due to assembly gaps in the genome were manually reviewed in Geneious and  
655 excluded from further analysis.

656 Homology modelling in RosettaCM (56) was used to build initial models of the SS14  
657 variant of each protein. For all sequences collected as part of this study, hhpred (53–55) was  
658 used to identify homologous structures, and only those sequences with fulllength alignments  
659 (covering >70% of the target) with high probability (>95% hhpred score) were considered for  
660 structural modelling. Given these alignments, 100 independent modelling trajectories were  
661 carried out for a reference sequence, guided by the top 1-7 templates for each target. We used  
662 the following templates in modelling each target: TP0136 used 4a2l and 5oj5; TP0326 used 4k3b  
663 and 5d0o; TP0548 used 6h3i; TP0966 used 1yc9, 3d5k, 4k7r, 4mt0, 4mt4, 5azs, and 6u94;  
664 TP0967 used 1yc9, 3d5k, 5azp, 5azs, and 6u94. For targets TP0966 and TP0967, modelling was  
665 carried out considering the complete homotrimeric configuration, using the symmetry of the  
666 templates as a guide.

667 Following homology modelling, the lowest-energy model was selected and used as a  
668 starting point for modelling the mutant sequences. We again used RosettaCM, providing the  
669 reference model as the “template” and each mutation as the “target” sequence. For each mutant  
670 sequence, three models were predicted and the lowest-energy one was used in analysis of  
671 structural deviations.

672 Structural deviation analysis involved comparing the structures of proteins with different  
673 sequences, and standard difference metrics (like backbone RMSd) do not properly report

674 differences in sidechain identities. Instead, we used a “per-atom RMSd” metric, where the  
675 structures were first superimposed on the reference structure by aligning common backbone  
676 atoms. Then, for each atom in the reference structure, the distance was computed not to a  
677 corresponding atom, but rather the closest atom of the same chemical identity (e.g., the oxygens  
678 of glutamate and aspartate would map to one another). This was then used to calculate the per-  
679 atom and per-residue RMS deviations reported in the manuscript. In this part of the analysis, the  
680 homotrimeric configuration of targets TP0966 and TP0967 was again used.

681 Bacterial signal peptide predictions were performed with SignalP 5.0 (58) Linear B cell  
682 epitopes were predicted using the BepiPred-2.0 (60).

683 **Statistics and Visualization:** Unless otherwise noted, all statistical analysis was performed in R  
684 v 4.0.0. Phylogenetic trees and metadata were visualized with the R packages ggtree (83), treeio  
685 (84), and ggplot (85), multiple sequence alignments by R package ggmsa (86) and figures  
686 generated using cowplot and Adobe Illustrator v24.1.3.

687 **Data Availability:** Paired end reads have been uploaded to the NCBI Sequencing Read Archive,  
688 Bioproject PRJNA723099. Consensus genomes have been deposited to NCBI Genome,  
689 accession numbers CP073381-CP073576 (Supporting Information 1 - Sample Accessions).

690

## 691 **Acknowledgements**

692 The authors would like to thank the individuals who donated specimens for the studies conducted  
693 here.

694

## 695 **References**

- 696 1. Schmidt R, Carson PJ, Jansen RJ. Resurgence of Syphilis in the United States: An  
697 Assessment of Contributing Factors. *Infect Dis.* 2019;12:1178633719883282.
- 698 2. U.S. Department of Health & Human Services. National Overview - Sexually Transmitted  
699 Disease Surveillance, 2019 [Internet]. [cited 2021 Apr 19]. Available from:  
700 <https://www.cdc.gov/std/statistics/2019/overview.htm#Syphilis>
- 701 3. Kojima N, Klausner JD. An Update on the Global Epidemiology of Syphilis. *Curr*  
702 *Epidemiol Rep.* 2018 Mar;5(1):24–38.
- 703 4. Kanyangarara M, Walker N, Boerma T. Gaps in the implementation of antenatal syphilis  
704 detection and treatment in health facilities across sub-Saharan Africa. *PloS One.*  
705 2018;13(6):e0198622.
- 706 5. Korenromp EL, Rowley J, Alonso M, Mello MB, Wijesooriya NS, Mahiané SG, et al.  
707 Global burden of maternal and congenital syphilis and associated adverse birth outcomes-  
708 Estimates for 2016 and progress since 2012. *PloS One.* 2019;14(2):e0211720.
- 709 6. Nurse-Findlay S, Taylor MM, Savage M, Mello MB, Saliyou S, Lavayen M, et al.  
710 Shortages of benzathine penicillin for prevention of mother-to-child transmission of  
711 syphilis: An evaluation from multi-country surveys and stakeholder interviews. *PLoS Med.*  
712 2017 Dec;14(12):e1002473.
- 713 7. Stamm LV, Bergen HL. A point mutation associated with bacterial macrolide resistance is  
714 present in both 23S rRNA genes of an erythromycin-resistant *Treponema pallidum* clinical  
715 isolate. *Antimicrob Agents Chemother.* 2000 Mar;44(3):806–7.



- 716 8. Šmajš D, Paštěková L, Grillová L. Macrolide Resistance in the Syphilis Spirochete,  
717 *Treponema pallidum* ssp. *pallidum*: Can We Also Expect Macrolide-Resistant Yaws  
718 Strains? *Am J Trop Med Hyg.* 2015 Oct;93(4):678–83.
- 719 9. Marra CM, Colina AP, Godornes C, Tantaló LC, Puray M, Centurion-Lara A, et al.  
720 Antibiotic selection may contribute to increases in macrolide-resistant *Treponema pallidum*.  
721 *J Infect Dis.* 2006 Dec 15;194(12):1771–3.
- 722 10. Walker EM, Zampighi GA, Blanco DR, Miller JN, Lovett MA. Demonstration of rare  
723 protein in the outer membrane of *Treponema pallidum* subsp. *pallidum* by freeze-fracture  
724 analysis. *J Bacteriol.* 1989 Sep;171(9):5005–11.
- 725 11. Radolf JD. *Treponema pallidum* and the quest for outer membrane proteins. *Mol Microbiol.*  
726 1995 Jun;16(6):1067–73.
- 727 12. Giacani L, Brandt SL, Ke W, Reid TB, Molini BJ, Iverson-Cabral S, et al. Transcription of  
728 TP0126, *Treponema pallidum* putative OmpW homolog, is regulated by the length of a  
729 homopolymeric guanosine repeat. *Infect Immun.* 2015 Jun;83(6):2275–89.
- 730 13. Haynes AM, Fernandez M, Romeis E, Mitjà O, Konda KA, Vargas SK, et al.  
731 Transcriptional and immunological analysis of the putative outer membrane protein and  
732 vaccine candidate TprL of *Treponema pallidum*. *PLoS Negl Trop Dis.* 2021  
733 Jan;15(1):e0008812.
- 734 14. Centurion-Lara A, LaFond RE, Hevner K, Godornes C, Molini BJ, Van Voorhis WC, et al.  
735 Gene conversion: a mechanism for generation of heterogeneity in the *tprK* gene of  
736 *Treponema pallidum* during infection. *Mol Microbiol.* 2004 Jun;52(6):1579–96.

- 737 15. Giacani L, Molini BJ, Kim EY, Godornes BC, Leader BT, Tantalo LC, et al. Antigenic  
738 variation in *Treponema pallidum*: TprK sequence diversity accumulates in response to  
739 immune pressure during experimental syphilis. *J Immunol Baltim Md 1950*. 2010 Apr  
740 1;184(7):3822–9.
- 741 16. Reid TB, Molini BJ, Fernandez MC, Lukehart SA. Antigenic variation of TprK facilitates  
742 development of secondary syphilis. *Infect Immun*. 2014 Dec;82(12):4959–67.
- 743 17. Edmondson DG, Hu B, Norris SJ. Long-Term In Vitro Culture of the Syphilis Spirochete  
744 *Treponema pallidum* subsp. *pallidum*. *mBio*. 2018 Jun 26;9(3).
- 745 18. Hopkins S, Lyons F, Coleman C, Courtney G, Bergin C, Mulcahy F. Resurgence in  
746 Infectious Syphilis in Ireland: An Epidemiological Study. *Sex Transm Dis*. 2004  
747 May;31(5):317–21.
- 748 19. Lukehart SA, Godornes C, Molini BJ, Sonnett P, Hopkins S, Mulcahy F, et al. Macrolide  
749 resistance in *Treponema pallidum* in the United States and Ireland. *N Engl J Med*. 2004 Jul  
750 8;351(2):154–8.
- 751 20. Marra CM, Sahi SK, Tantalo LC, Godornes C, Reid T, Behets F, et al. Enhanced molecular  
752 typing of *treponema pallidum*: geographical distribution of strain types and association with  
753 neurosyphilis. *J Infect Dis*. 2010 Nov 1;202(9):1380–8.
- 754 21. Hook III EW, Behets F, Van Damme K, Ravelomanana N, Leone P, Sena AC, et al. A  
755 Phase III Equivalence Trial of Azithromycin versus Benzathine Penicillin for Treatment of  
756 Early Syphilis. *J Infect Dis*. 2010 Jun;201(11):1729–35.

- 757 22. Van Damme K, Behets F, Ravelomanana N, Godornes C, Khan M, Randrianasolo B, et al.  
758 Evaluation of Azithromycin Resistance in *Treponema pallidum* Specimens From  
759 Madagascar. *Sex Transm Dis.* 2009 Dec;36(12):775–6.
- 760 23. Croucher NJ, Page AJ, Connor TR, Delaney AJ, Keane JA, Bentley SD, et al. Rapid  
761 phylogenetic analysis of large samples of recombinant bacterial whole genome sequences  
762 using Gubbins. *Nucleic Acids Res.* 2015 Feb 18;43(3):e15.
- 763 24. Beale MA, Marks M, Sahi SK, Tantaló LC, Nori AV, French P, et al. Genomic  
764 epidemiology of syphilis reveals independent emergence of macrolide resistance across  
765 multiple circulating lineages. *Nat Commun.* 2019 Jul 22;10(1):3255.
- 766 25. Grimes M, Sahi SK, Godornes BC, Tantaló LC, Roberts N, Bostick D, et al. Two mutations  
767 associated with macrolide resistance in *Treponema pallidum*: increasing prevalence and  
768 correlation with molecular strain type in Seattle, Washington. *Sex Transm Dis.* 2012  
769 Dec;39(12):954–8.
- 770 26. Nishiki S, Lee K, Kanai M, Nakayama S-I, Ohnishi M. Phylogenetic and genetic  
771 characterization of *Treponema pallidum* strains from syphilis patients in Japan by whole-  
772 genome sequence analysis from global perspectives. *Sci Rep.* 2021 Feb 4;11(1):3154.
- 773 27. Pětrošová H, Zobaníková M, Čejková D, Mikalová L, Pospíšilová P, Strouhal M, et al.  
774 Whole genome sequence of *Treponema pallidum* ssp. *pallidum*, strain Mexico A, suggests  
775 recombination between yaws and syphilis strains. *PLoS Negl Trop Dis.* 2012;6(9):e1832.

- 776 28. Centurion-Lara A, Giacani L, Godornes C, Molini BJ, Brinck Reid T, Lukehart SA. Fine  
777 analysis of genetic diversity of the tpr gene family among treponemal species, subspecies  
778 and strains. PLoS Negl Trop Dis. 2013;7(5):e2222.
- 779 29. Kawahata T, Kojima Y, Furubayashi K, Shinohara K, Shimizu T, Komano J, et al. Bejel, a  
780 Nonvenereal Treponematoses, among Men Who Have Sex with Men, Japan. Emerg Infect  
781 Dis. 2019 Aug;25(8):1581–3.
- 782 30. Noda AA, Grillová L, Lienhard R, Blanco O, Rodríguez I, Šmajš D. Bejel in Cuba:  
783 molecular identification of *Treponema pallidum* subsp. endemicum in patients diagnosed  
784 with venereal syphilis. Clin Microbiol Infect Off Publ Eur Soc Clin Microbiol Infect Dis.  
785 2018 Nov;24(11):1210.e1-1210.e5.
- 786 31. Mikalová L, Strouhal M, Oppelt J, Grange PA, Janier M, Benhaddou N, et al. Human  
787 *Treponema pallidum* 11q/j isolate belongs to subsp. endemicum but contains two loci with  
788 a sequence in TP0548 and TP0488 similar to subsp. pertenue and subsp. pallidum,  
789 respectively. PLoS Negl Trop Dis. 2017 Mar;11(3):e0005434.
- 790 32. Grillova L, Jolley K, Šmajš D, Picardeau M. A public database for the new MLST scheme  
791 for *Treponema pallidum* subsp. pallidum: surveillance and epidemiology of the causative  
792 agent of syphilis. PeerJ. 2019;6:e6182.
- 793 33. Grillová L, Oppelt J, Mikalová L, Nováková M, Giacani L, Niesnerová A, et al. Directly  
794 Sequenced Genomes of Contemporary Strains of Syphilis Reveal Recombination-Driven  
795 Diversity in Genes Encoding Predicted Surface-Exposed Antigens. Front Microbiol.  
796 2019;10:1691.

- 797 34. Kumar S, Caimano MJ, Anand A, Dey A, Hawley KL, LeDoyt ME, et al. Sequence  
798 Variation of Rare Outer Membrane Protein  $\beta$ -Barrel Domains in Clinical Strains Provides  
799 Insights into the Evolution of *Treponema pallidum* subsp. *pallidum*, the Syphilis  
800 Spirochete. *mBio*. 2018 Jun 12;9(3).
- 801 35. Gray RR, Mulligan CJ, Molini BJ, Sun ES, Giacani L, Godornes C, et al. Molecular  
802 evolution of the *tprC*, *D*, *I*, *K*, *G*, and *J* genes in the pathogenic genus *Treponema*. *Mol Biol*  
803 *Evol*. 2006 Nov;23(11):2220–33.
- 804 36. Majander K, Pfrengle S, Kocher A, Neukamm J, du Plessis L, Pla-Díaz M, et al. Ancient  
805 Bacterial Genomes Reveal a High Diversity of *Treponema pallidum* Strains in Early  
806 Modern Europe. *Curr Biol CB*. 2020 Oct 5;30(19):3788-3803.e10.
- 807 37. Zobaníková M, Strouhal M, Mikalová L, Cejková D, Ambrožová L, Pospíšilová P, et al.  
808 Whole genome sequence of the *Treponema* Fribourg-Blanc: unspecified simian isolate is  
809 highly similar to the yaws subspecies. *PLoS Negl Trop Dis*. 2013;7(4):e2172.
- 810 38. Bouckaert R, Vaughan TG, Barido-Sottani J, Duchêne S, Fourment M, Gavryushkina A, et  
811 al. BEAST 2.5: An advanced software platform for Bayesian evolutionary analysis. *PLoS*  
812 *Comput Biol*. 2019 Apr;15(4):e1006650.
- 813 39. Arora N, Schuenemann VJ, Jäger G, Peltzer A, Seitz A, Herbig A, et al. Origin of modern  
814 syphilis and emergence of a pandemic *Treponema pallidum* cluster. *Nat Microbiol*. 2017  
815 Jan;2(1):16245.

- 816 40. Huddleston J, Hadfield J, Sibley T, Lee J, Fay K, Ilcisin M, et al. Augur: a bioinformatics  
817 toolkit for phylogenetic analyses of human pathogens. *J Open Source Softw.* 2021 Jan  
818 7;6(57):2906.
- 819 41. Houston S, Lithgow KV, Osbak KK, Kenyon CR, Cameron CE. Functional insights from  
820 proteome-wide structural modeling of *Treponema pallidum* subspecies *pallidum*, the  
821 causative agent of syphilis. *BMC Struct Biol.* 2018 May 16;18(1):7.
- 822 42. Brinkman MB, McKeivitt M, McLoughlin M, Perez C, Howell J, Weinstock GM, et al.  
823 Reactivity of antibodies from syphilis patients to a protein array representing the  
824 *Treponema pallidum* proteome. *J Clin Microbiol.* 2006 Mar;44(3):888–91.
- 825 43. McGill MA, Edmondson DG, Carroll JA, Cook RG, Orkiszewski RS, Norris SJ.  
826 Characterization and serologic analysis of the *Treponema pallidum* proteome. *Infect*  
827 *Immun.* 2010 Jun;78(6):2631–43.
- 828 44. Subramanian G, Koonin EV, Aravind L. Comparative genome analysis of the pathogenic  
829 spirochetes *Borrelia burgdorferi* and *Treponema pallidum*. *Infect Immun.* 2000  
830 Mar;68(3):1633–48.
- 831 45. Hawley KL, Montezuma-Rusca JM, Delgado KN, Singh N, Uversky VN, Caimano MJ, et  
832 al. Structural modeling of the *Treponema pallidum* OMPeome: a roadmap for  
833 deconvolution of syphilis pathogenesis and development of a syphilis vaccine. *J Bacteriol.*  
834 2021 May 10;
- 835 46. Radolf JD, Kumar S. The *Treponema pallidum* Outer Membrane. *Curr Top Microbiol*  
836 *Immunol.* 2018;415:1–38.

- 837 47. Brinkman MB, McGill MA, Pettersson J, Rogers A, Matejková P, Smajs D, et al. A novel  
838 *Treponema pallidum* antigen, TP0136, is an outer membrane protein that binds human  
839 fibronectin. *Infect Immun*. 2008 May;76(5):1848–57.
- 840 48. Djokic V, Giacani L, Parveen N. Analysis of host cell binding specificity mediated by the  
841 Tp0136 adhesin of the syphilis agent *Treponema pallidum* subsp. *pallidum*. *PLoS Negl*  
842 *Trop Dis*. 2019 May;13(5):e0007401.
- 843 49. Ke W, Molini BJ, Lukehart SA, Giacani L. *Treponema pallidum* subsp. *pallidum* TP0136  
844 Protein Is Heterogeneous among Isolates and Binds Cellular and Plasma Fibronectin via its  
845 NH2-Terminal End. Picardeau M, editor. *PLoS Negl Trop Dis*. 2015 Mar  
846 20;9(3):e0003662.
- 847 50. Cameron CE, Lukehart SA, Castro C, Molini B, Godornes C, Van Voorhis WC. Opsonic  
848 potential, protective capacity, and sequence conservation of the *Treponema pallidum*  
849 subspecies *pallidum* Tp92. *J Infect Dis*. 2000 Apr;181(4):1401–13.
- 850 51. Zhao F, Wu Y, Zhang X, Yu J, Gu W, Liu S, et al. Enhanced immune response and  
851 protective efficacy of a *Treponema pallidum* Tp92 DNA vaccine vectored by chitosan  
852 nanoparticles and adjuvanted with IL-2. *Hum Vaccin*. 2011 Oct;7(10):1083–9.
- 853 52. Tomson FL, Conley PG, Norgard MV, Hagman KE. Assessment of cell-surface exposure  
854 and vaccinogenic potentials of *Treponema pallidum* candidate outer membrane proteins.  
855 *Microbes Infect*. 2007 Sep;9(11):1267–75.

- 856 53. Zimmermann L, Stephens A, Nam S-Z, Rau D, Kübler J, Lozajic M, et al. A Completely  
857 Reimplemented MPI Bioinformatics Toolkit with a New HHpred Server at its Core. *J Mol*  
858 *Biol.* 2018 Jul;430(15):2237–43.
- 859 54. Gabler F, Nam S, Till S, Mirdita M, Steinegger M, Söding J, et al. Protein Sequence  
860 Analysis Using the MPI Bioinformatics Toolkit. *Curr Protoc Bioinforma* [Internet]. 2020  
861 Dec [cited 2021 Jun 7];72(1). Available from:  
862 <https://onlinelibrary.wiley.com/doi/10.1002/cpbi.108>
- 863 55. Söding J, Biegert A, Lupas AN. The HHpred interactive server for protein homology  
864 detection and structure prediction. *Nucleic Acids Res.* 2005 Jul 1;33(Web Server  
865 issue):W244-248.
- 866 56. Song Y, DiMaio F, Wang RY-R, Kim D, Miles C, Brunette T, et al. High-Resolution  
867 Comparative Modeling with RosettaCM. *Structure.* 2013 Oct;21(10):1735–42.
- 868 57. Desrosiers DC, Anand A, Luthra A, Dunham-Ems SM, LeDoyt M, Cummings MAD, et al.  
869 TP0326, a *Treponema pallidum*  $\beta$ -barrel assembly machinery A (BamA) orthologue and  
870 rare outer membrane protein. *Mol Microbiol.* 2011 Jun;80(6):1496–515.
- 871 58. Almagro Armenteros JJ, Tsirigos KD, Sønderby CK, Petersen TN, Winther O, Brunak S, et  
872 al. SignalP 5.0 improves signal peptide predictions using deep neural networks. *Nat*  
873 *Biotechnol.* 2019 Apr;37(4):420–3.
- 874 59. Luthra A, Anand A, Hawley KL, LeDoyt M, La Vake CJ, Caimano MJ, et al. A Homology  
875 Model Reveals Novel Structural Features and an Immunodominant Surface Loop/Opsonic



- 876 Target in the *Treponema pallidum* BamA Ortholog TP\_0326. *J Bacteriol.* 2015  
877 Jun;197(11):1906–20.
- 878 60. Jespersen MC, Peters B, Nielsen M, Marcatili P. BepiPred-2.0: improving sequence-based  
879 B-cell epitope prediction using conformational epitopes. *Nucleic Acids Res.* 2017 Jul  
880 3;45(W1):W24–9.
- 881 61. Chouhan B, Denesyuk A, Heino J, Johnson MS, Denessiouk K. Conservation of the human  
882 integrin-type beta-propeller domain in bacteria. *PloS One.* 2011;6(10):e25069.
- 883 62. Bonnardel F, Kumar A, Wimmerova M, Lahmann M, Perez S, Varrot A, et al. Architecture  
884 and Evolution of Blade Assembly in  $\beta$ -propeller Lectins. *Structure.* 2019 May;27(5):764-  
885 775.e3.
- 886 63. Beale MA, Marks M, Cole MJ, Lee M-K, Pitt R, Ruis C, et al. Contemporary syphilis is  
887 characterised by rapid global spread of pandemic *Treponema pallidum* lineages [Internet].  
888 *Infectious Diseases (except HIV/AIDS)*; 2021 Mar [cited 2021 Jun 8]. Available from:  
889 <http://medrxiv.org/lookup/doi/10.1101/2021.03.25.21250180>
- 890 64. Titz B, Rajagopala SV, Goll J, Häuser R, McKevitt MT, Palzkill T, et al. The binary protein  
891 interactome of *Treponema pallidum*--the syphilis spirochete. *PloS One.* 2008 May  
892 28;3(5):e2292.
- 893 65. Romeis E, Tantalò L, Lieberman N, Phung Q, Greninger A, Giacani L. Genetic Engineering  
894 of *Treponema pallidum* subsp. *pallidum* , the Syphilis Spirochete [Internet]. *Microbiology*;  
895 2021 May [cited 2021 Jun 10]. Available from:  
896 <http://biorxiv.org/lookup/doi/10.1101/2021.05.07.443079>

- 897 66. Addetia A, Lin MJ, Phung Q, Xie H, Huang M-L, Ciccarese G, et al. Estimation of Full-  
898 Length TprK Diversity in *Treponema pallidum* subsp. *pallidum*. Norris SJ, editor. mBio  
899 [Internet]. 2020 Oct 27 [cited 2021 Jun 7];11(5). Available from:  
900 <https://journals.asm.org/doi/10.1128/mBio.02726-20>
- 901 67. Bolger AM, Lohse M, Usadel B. Trimmomatic: a flexible trimmer for Illumina sequence  
902 data. *Bioinforma Oxf Engl*. 2014 Aug 1;30(15):2114–20.
- 903 68. Bushnell B. BBMap short read aligner, and other bioinformatic tools.
- 904 69. Langmead B, Salzberg SL. Fast gapped-read alignment with Bowtie 2. *Nat Methods*. 2012  
905 Apr;9(4):357–9.
- 906 70. Li H, Handsaker B, Wysoker A, Fennell T, Ruan J, Homer N, et al. The Sequence  
907 Alignment/Map format and SAMtools. *Bioinformatics*. 2009 Aug 15;25(16):2078–9.
- 908 71. Broad Institute. Picard [Internet]. Available from: <http://broadinstitute.github.io/picard>.
- 909 72. Wick RR, Judd LM, Gorrie CL, Holt KE. Unicycler: Resolving bacterial genome  
910 assemblies from short and long sequencing reads. Phillippy AM, editor. *PLOS Comput*  
911 *Biol*. 2017 Jun 8;13(6):e1005595.
- 912 73. Li H, Durbin R. Fast and accurate short read alignment with Burrows-Wheeler transform.  
913 *Bioinforma Oxf Engl*. 2009 Jul 15;25(14):1754–60.
- 914 74. Greninger AL, Roychoudhury P, Xie H, Casto A, Cent A, Pepper G, et al. Ultrasensitive  
915 Capture of Human Herpes Simplex Virus Genomes Directly from Clinical Samples Reveals  
916 Extraordinarily Limited Evolution in Cell Culture. *mSphere*. 2018 Jun 27;3(3).

- 917 75. Walker BJ, Abeel T, Shea T, Priest M, Abouelliel A, Sakthikumar S, et al. Pilon: An  
918 Integrated Tool for Comprehensive Microbial Variant Detection and Genome Assembly  
919 Improvement. Wang J, editor. PLoS ONE. 2014 Nov 19;9(11):e112963.
- 920 76. Geneious. Geneious [Internet]. Available from: <https://www.geneious.com>
- 921 77. Katoh K, Standley DM. MAFFT Multiple Sequence Alignment Software Version 7:  
922 Improvements in Performance and Usability. Mol Biol Evol. 2013 Apr 1;30(4):772–80.
- 923 78. Kwong J, Seemann T. maskrc-svg [Internet]. Available from:  
924 <https://github.com/kwongj/maskrc-svg>
- 925 79. Nguyen L-T, Schmidt HA, von Haeseler A, Minh BQ. IQ-TREE: A Fast and Effective  
926 Stochastic Algorithm for Estimating Maximum-Likelihood Phylogenies. Mol Biol Evol.  
927 2015 Jan;32(1):268–74.
- 928 80. Rambaut A, Lam TT, Max Carvalho L, Pybus OG. Exploring the temporal structure of  
929 heterochronous sequences using TempEst (formerly Path-O-Gen). Virus Evol. 2016  
930 Jan;2(1):vew007.
- 931 81. Pages H, Aboyou P, Gentleman R, DebRoy S. Biostrings: Efficient manipulation of  
932 biological strings. R package version 2.60.1 [Internet]. Available from:  
933 <https://bioconductor.org/packages/Biostrings>
- 934 82. Seemann T. Prokka: rapid prokaryotic genome annotation. Bioinforma Oxf Engl. 2014 Jul  
935 15;30(14):2068–9.

- 936 83. Yu G, Smith DK, Zhu H, Guan Y, Lam TT. ggtree: an R package for visualization and  
937 annotation of phylogenetic trees with their covariates and other associated data. McInerny  
938 G, editor. *Methods Ecol Evol*. 2017 Jan;8(1):28–36.
- 939 84. Wang L-G, Lam TT-Y, Xu S, Dai Z, Zhou L, Feng T, et al. Treeio: An R Package for  
940 Phylogenetic Tree Input and Output with Richly Annotated and Associated Data. Kumar S,  
941 editor. *Mol Biol Evol*. 2020 Feb 1;37(2):599–603.
- 942 85. Wickham H. *ggplot2: Elegant Graphics for Data Analysis*. 2nd ed. 2016. Cham: Springer  
943 International Publishing : Imprint: Springer; 2016. 1 p. (Use R!).
- 944 86. Yu G, Zhou L, Xu S, Huang H. ggmsa 1.0.0. [cited 2021 Jul 11]. Available from:  
945 <http://yulab-smu.top/ggmsa/authors.html>

946

#### 947 **Figure Legends:**

948 **Figure 1: Whole genome phylogeny of *T. pallidum* patient isolates.** A) Whole genomes were  
949 MAFFT-aligned, recombination-masked, and maximum-likelihood phylogeny determined. Tips  
950 are shown as grey triangles and nodes with >0.95 support from 1000 ultrafast bootstraps shown  
951 as black circles. B) Subspecies/lineage, subclade, and continent of origin of all samples included  
952 in phylogeny. C) Azithromycin sensitivity/resistance as conferred by the 23S rRNA 2058/2059  
953 alleles. Data represents alleles at both rRNA loci. D) MLST subtypes, including novel  
954 sequences, for *tp0136*, *tp0548*, and *tp0705*, as well as whether the three alleles constitute a  
955 known or novel MLST. Top 6 most abundant sequences at each locus are colored, while other  
956 less abundant known and novel sequences are grouped and colored in light and medium grey,

957 respectively. Sequences containing N bases are denoted as indeterminate and shown in dark  
958 grey. Expanded metadata for all samples is included in Supporting Information 1.

959

960 **Figure 2: Effect of recombination on *T. pallidum* subsp. *pallidum* evolution.** A)

961 Recombination-masked (left) and unmasked (right) phylogenies, with equivalent subclades  
962 highlighted. Relative position of each tip is traced between the two panels. B) Putative  
963 recombinogenic regions in each clade. Genomic position is relative to the length of the MAFFT  
964 alignment. Consensus alignment of all tips is shown on the grey panel, with recombination  
965 blocks lettered above. Grey blocks represent recombination that occurred during evolution of the  
966 SS14 clade. Red and blue blocks represent recombination events unique to each clade. Mixed  
967 grey and colored blocks are regions of ancestral recombination that had a second event unique to  
968 that clade. C-F) Two example regions of recombination in SS14 Mexico (C), Nichols A (D),  
969 Nichols B (E), and Nichols E (F). Genomic position of the first divergent base in the window  
970 shown are shown with NC\_021508.1 numbering.

971

972 **Figure 3: SS14 and Nichols subclades have different rates of SNP accumulation.** A) Linear

973 regressions for recombination-masked root-to-tip distances from maximum likelihood phylogeny  
974 as a function of year of collection, including (left) or not including (right) highly passaged  
975 laboratory strains. B) Residuals from linear regression without laboratory strains were plotted per  
976 subclade,  $p < 2e^{-16}$ , ANOVA. C) Bayesian maximum clade credibility tree showing mean  
977 common ancestor heights. Highlighted nodes have a posterior probability of  $>0.95$ , and branch  
978 colors reveal rate of change (SNPs per genome per year). Ages and 95% highest posterior  
979 density are included for nodes of interest including the TPA, SS14, and Nichols ancestral nodes,

980 as well as those of each subclade. Inset: For each tip, mean rates of SNP accumulation along  
981 branches with >0.95 posterior probability were plotted per subclade,  $p < 2e^{-16}$ , ANOVA.

982

983 **Figure 4: Coding mutations in the *T. pallidum* subsp. *pallidum* phylogeny.** A) Whole genome  
984 ML phylogeny of TPA, with tips collapsed to the subclade node. Open reading frames of  
985 inferred ancestral sequences for each node were annotated based on the SS14 reference sequence  
986 NC\_021508. Coding mutations, including for putative recombinant genes, for each child node  
987 were determined relative to its parent node (complete list in Supporting Information 4). Loci  
988 with amino acid differences (n=49 loci, n=134 individual AA mutation events) in the SS14  
989 ancestral clade node (N101) are shown relative to the Nichols ancestral node (N001). B)  
990 Positions are equivalent to those shown in A. Black square represents the Nichols Ancestral  
991 Node (N001). Number of antigens with coding mutations on each child node relative to parent  
992 node. Color represents p value of for overrepresentation by Fisher's Exact test of antigens among  
993 all mutated proteins per branch; those in grey have a p value > 0.05. C) Percentage of total  
994 individual mutation events per branch. Raw numbers of mutation events in antigens per total  
995 mutation events are shown for each branch. D) Tile plot showing mutated proteins in the  
996 ancestral node for each subclade relative to its parent node, colored by antigen or not. Proteins  
997 are arranged by number of subclades bearing mutations. Data is recapitulated in Supporting  
998 Information 3

999

1000 **Supplementary Figure 1: Distribution of putative protein functional annotation based on**  
1001 **high-confidence Phyre2 models.** Percent of proteins in each category different between the  
1002 SS14 ancestral clade node (N101) and the Nichols ancestral node (N001) (orange) were

1003 compared to annotations across the whole genome (purple). Overrepresentation was tested by  
1004 Fisher's exact test,  $*p < 0.05$ .

1005

1006 **Supplementary Figure 2: Multiple sequence alignment and structural modeling of TP0326.**

1007 A) Multiple sequence alignment for all amino acid sequence variants. Polymorphic residues are  
1008 highlighted, and positions of extracellular loops 3, 4, and 7 are shown. B) Side (left) and top  
1009 (right) cartoon representation of TP0326, with a color gradient between blue at the N-terminus to  
1010 red at the C-terminus. C) Side (left) and top (right) space-filling representation of TP0326, with  
1011 polymorphic residue positions colored magenta. D) Side (left) and top (right) space-filling  
1012 representation of TP0326, with atoms colored by average per atom displacement in all variants  
1013 relative to the SS14 reference sequence. Arrows, single arrowheads, and double arrowheads  
1014 point to positions of ECLs 4, 7, and 3, respectively.

1015

1016 **Supplementary Figure 3: Multiple sequence alignment and structural modeling of TP0548.**

1017 A) Multiple sequence alignment for all amino acid sequence variants. Polymorphic residues are  
1018 highlighted, and positions of relevant predicted B cell epitopes are shown. B) Side (left) and top  
1019 (right) cartoon representation of TP0548, with a color gradient between blue at the N-terminus to  
1020 red at the C-terminus. Arrows point to the flexible loops that contain predicted linear BCEs. C)  
1021 Side (left) and top (right) space-filling representation of TP0548, with polymorphic residue  
1022 positions colored magenta. D) Side (left) and top (right) space-filling representation of TP0966,  
1023 with atoms colored by average per atom displacement in all variants relative to the SS14  
1024 reference sequence. Arrow points to ECL-2, which contains two invariant predicted BCEs.

1025

1026 **Supplementary Figure 4: Multiple sequence alignment and structural modeling of TP0966.**

1027 A) Multiple sequence alignment for all amino acid sequence variants. Polymorphic residues are  
1028 highlighted. ECLs 1 and 2 are boxed, and the linear BCEs contained in the SS14 variant (#1) are  
1029 marked in red. B) Side (left) and top (right) cartoon representation of TP0966, with a color  
1030 gradient between blue at the N-terminus to red at the C-terminus. C) Side (left) and top (right)  
1031 space-filling representation of TP0966, with polymorphic residue positions colored magenta.  
1032 Arrow points to polymorphic residues in surface loops. D) Side (left) and top (right) space-filling  
1033 representation of TP0966, with atoms colored by average per atom displacement in all variants  
1034 relative to the SS14 reference sequence. Arrows point to the high displacement, non-  
1035 polymorphic residues.

1036

1037 **Supplementary Figure 5: Multiple sequence alignment and structural modeling of TP0967.**

1038 A) Multiple sequence alignment for all amino acid sequence variants. Polymorphic residues are  
1039 highlighted. ECL1 is boxed, and the linear BCE contained in the SS14 variant (#4) is marked in  
1040 red. B) Side (left) and top (right) cartoon representation of TP0967, with a color gradient  
1041 between blue at the N-terminus to red at the C-terminus. C) Side (left) and top (right) space-  
1042 filling representation of TP0967, with polymorphic residue positions colored magenta. Arrow  
1043 points to polymorphic residues in surface loops. D) Side (left) and top (right) space-filling  
1044 representation of TP0967, with atoms colored by average per atom displacement in all variants  
1045 relative to the SS14 reference sequence. Arrows point to the high displacement, non-  
1046 polymorphic residues.

1047



1048 **Supplementary Figure 6: Multiple sequence alignment and structural modeling of TP0136.**

1049 A) Multiple sequence alignment for all amino acid sequence variants. Polymorphic residues are  
1050 highlighted. B) Side (left) and top (right) cartoon representation of TP0136, with a color gradient  
1051 between blue at the N-terminus to red at the C-terminus. C) Side (left) and top (right) space-  
1052 filling representation of TP0136, with polymorphic residue positions colored magenta. D) Side  
1053 (left) and top (right) space-filling representation of TP0136, with atoms colored by average per  
1054 atom displacement in all variants relative to the SS14 reference sequence. Boxed areas represent  
1055 regions of low displacement in the  $\beta$ -strands. In all panels, arrows point to the large extracellular  
1056 loop that is removed in variants found in several subclades.

1057

1058 **Supporting Information 1: Expanded metadata for all samples presented in Figure 1.**

1059 **Sample Statistics:** “Input Genomes” refers to the number of copies of TP47 (*tp0574*) included in  
1060 pre-capture library preparation. “Coverage” refers to the average deduplicated read depth at any  
1061 position in the initial mapping of reads to the reference sequence NC\_021508. “Length” is the  
1062 length of the final consensus genome. “Number Ambiguities” and “Percent Ambiguities” refers  
1063 to Ns in samples prior to masking. **Sample Accessions:** NCBI Biosample and assembly  
1064 accessions per sample. **Sample Metadata:** “Tip Number” refers to sample position on the  
1065 phylogenetic tree in Figure 1, with #1 at the bottom of the page. ***tp0136 MLST, tp0548 MLST,***  
1066 ***tp0705 MLST:*** Complete information on MLST alleles, including how novel sequences relate to  
1067 the closest known match.

1068

1069 **Supporting Information 2: Expanded Recombination Data from Figure 2: Tip Order:** Top

1070 to bottom order of tips in recombination masked and unmasked phylogenies. **Recombination**

1071 **Blocks:** Genes included in each recombination block. **Blocks per Clade:** Precise locations of  
1072 recombination events detected per clade.

1073

1074 **Supporting Information 3: Expanded data for Figure 4. Summary Data by Locus:**

1075 Information on number of mutations per locus per branch, including functional annotations.

1076 **Antigens:** List of loci included as antigens. CDS name and genomic position information is from

1077 NC\_021508.1. **Heatmap Data:** Data included in Figure 4D. “Sum” represents the number of

1078 nodes at which there is a change in that locus. **NXXX vs NYYY:** Detailed information on all

1079 detected mutations per branch, named by parent and child node number.

1080

1081 **Supporting Information 4: Expanded data for Supplementary Figures 2-6.** TP0136,

1082 TP0326, TP0548, TP0966, and TP0967 variant amino acid sequence by sample and subclade.

1083

1084

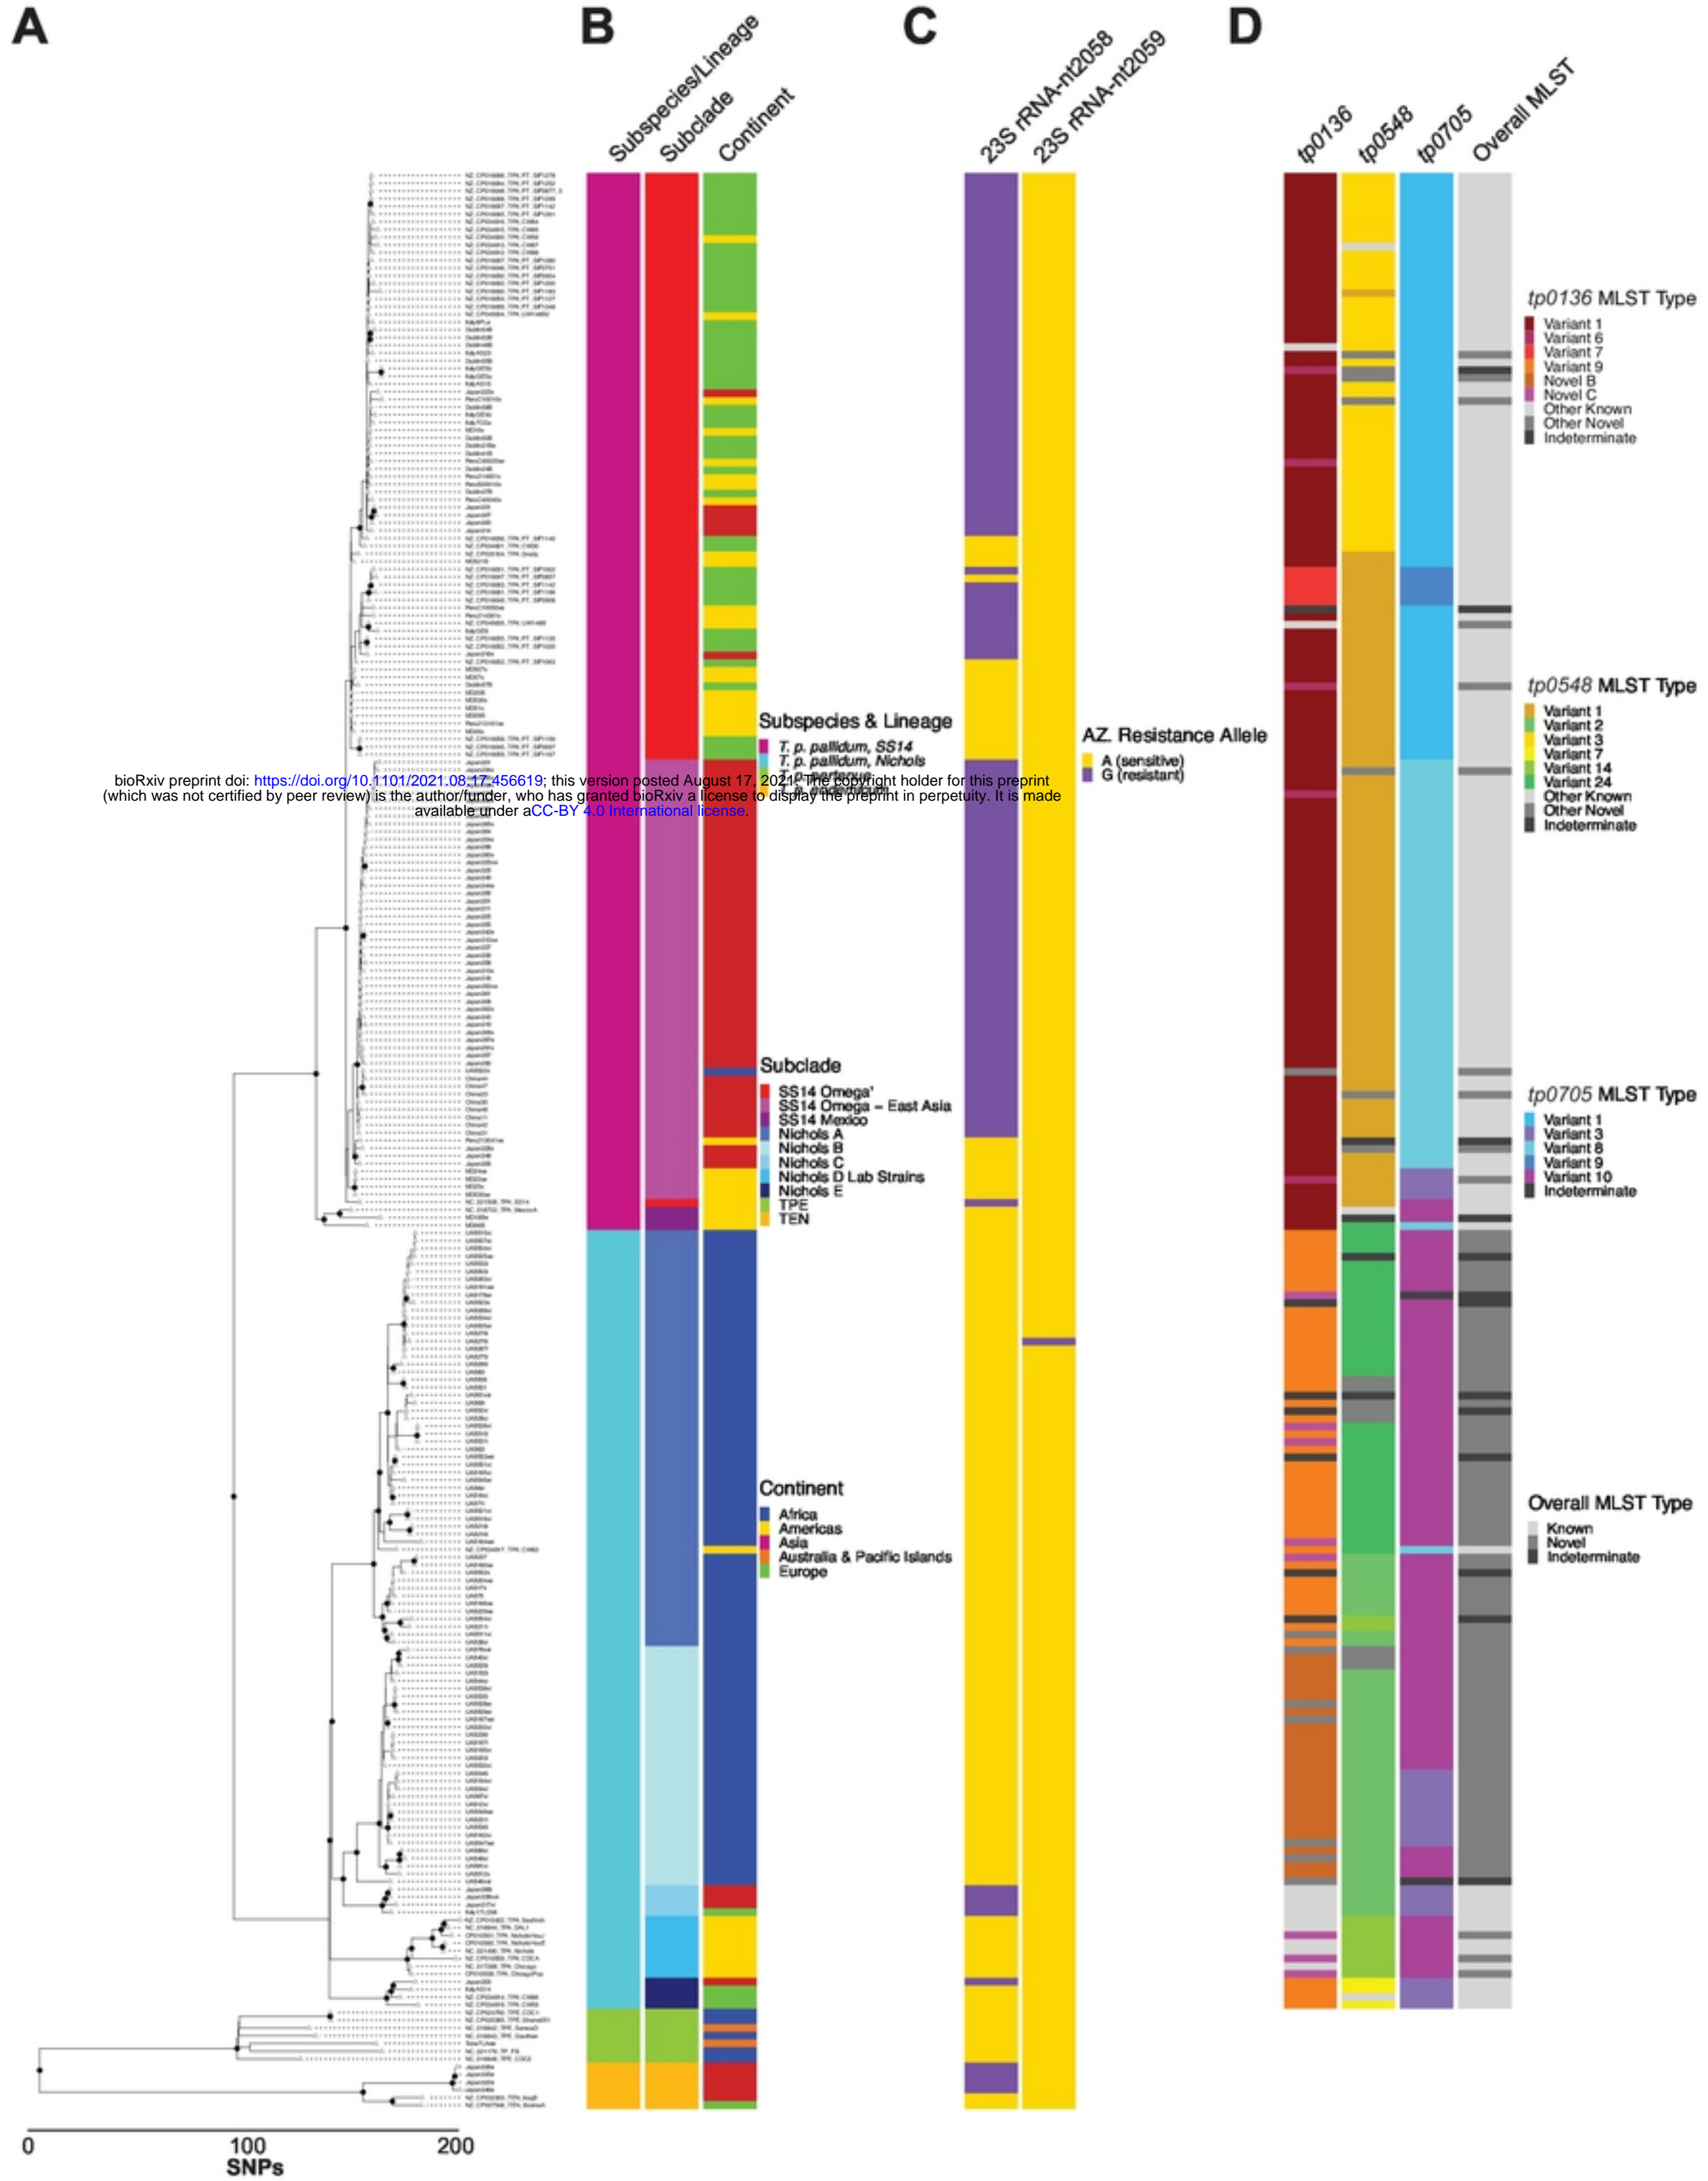

Figure 1



A

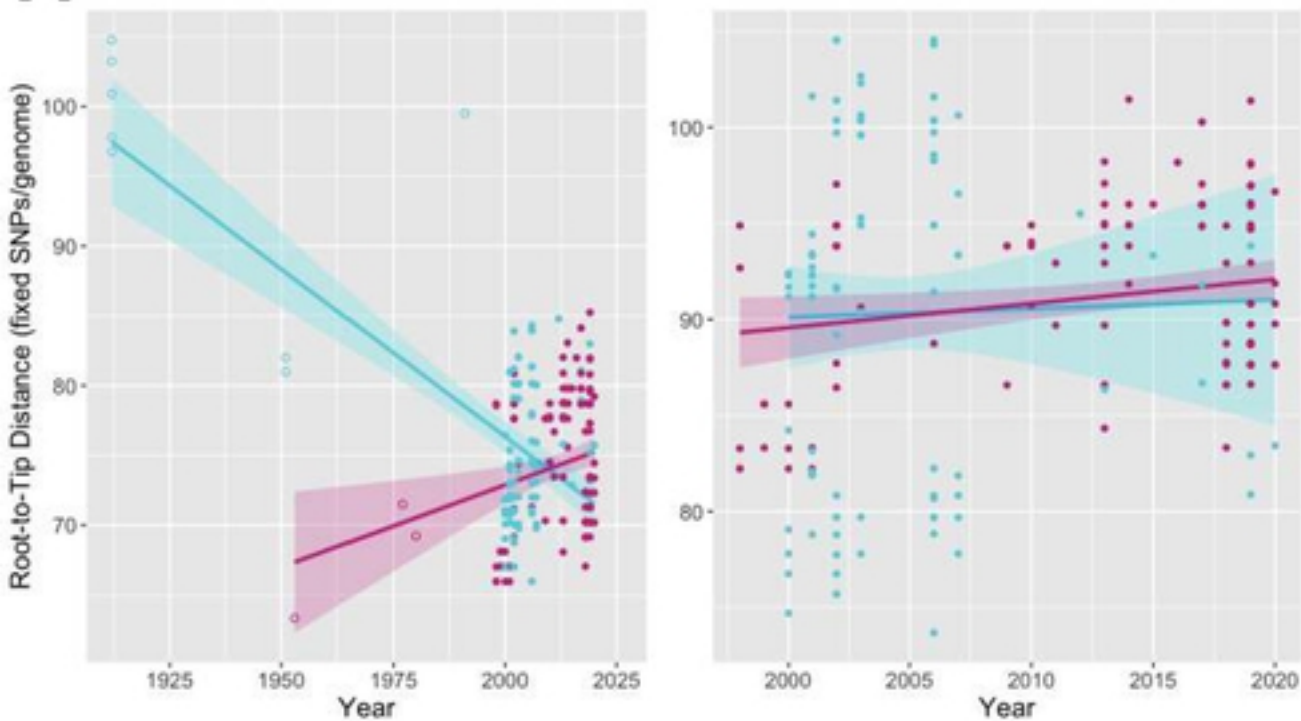

B

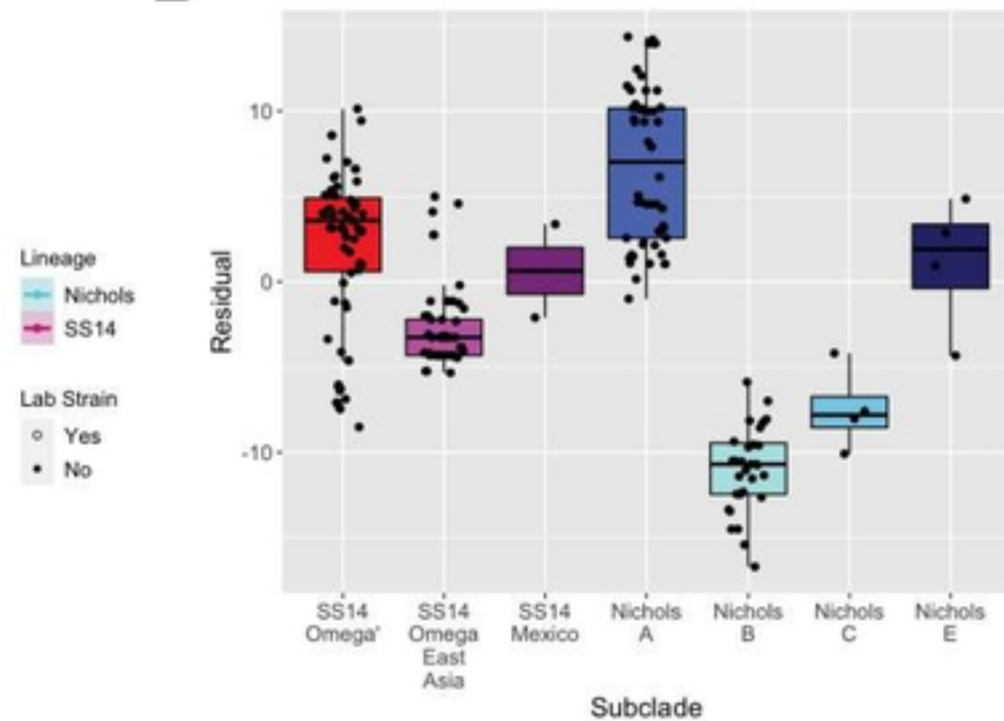

C

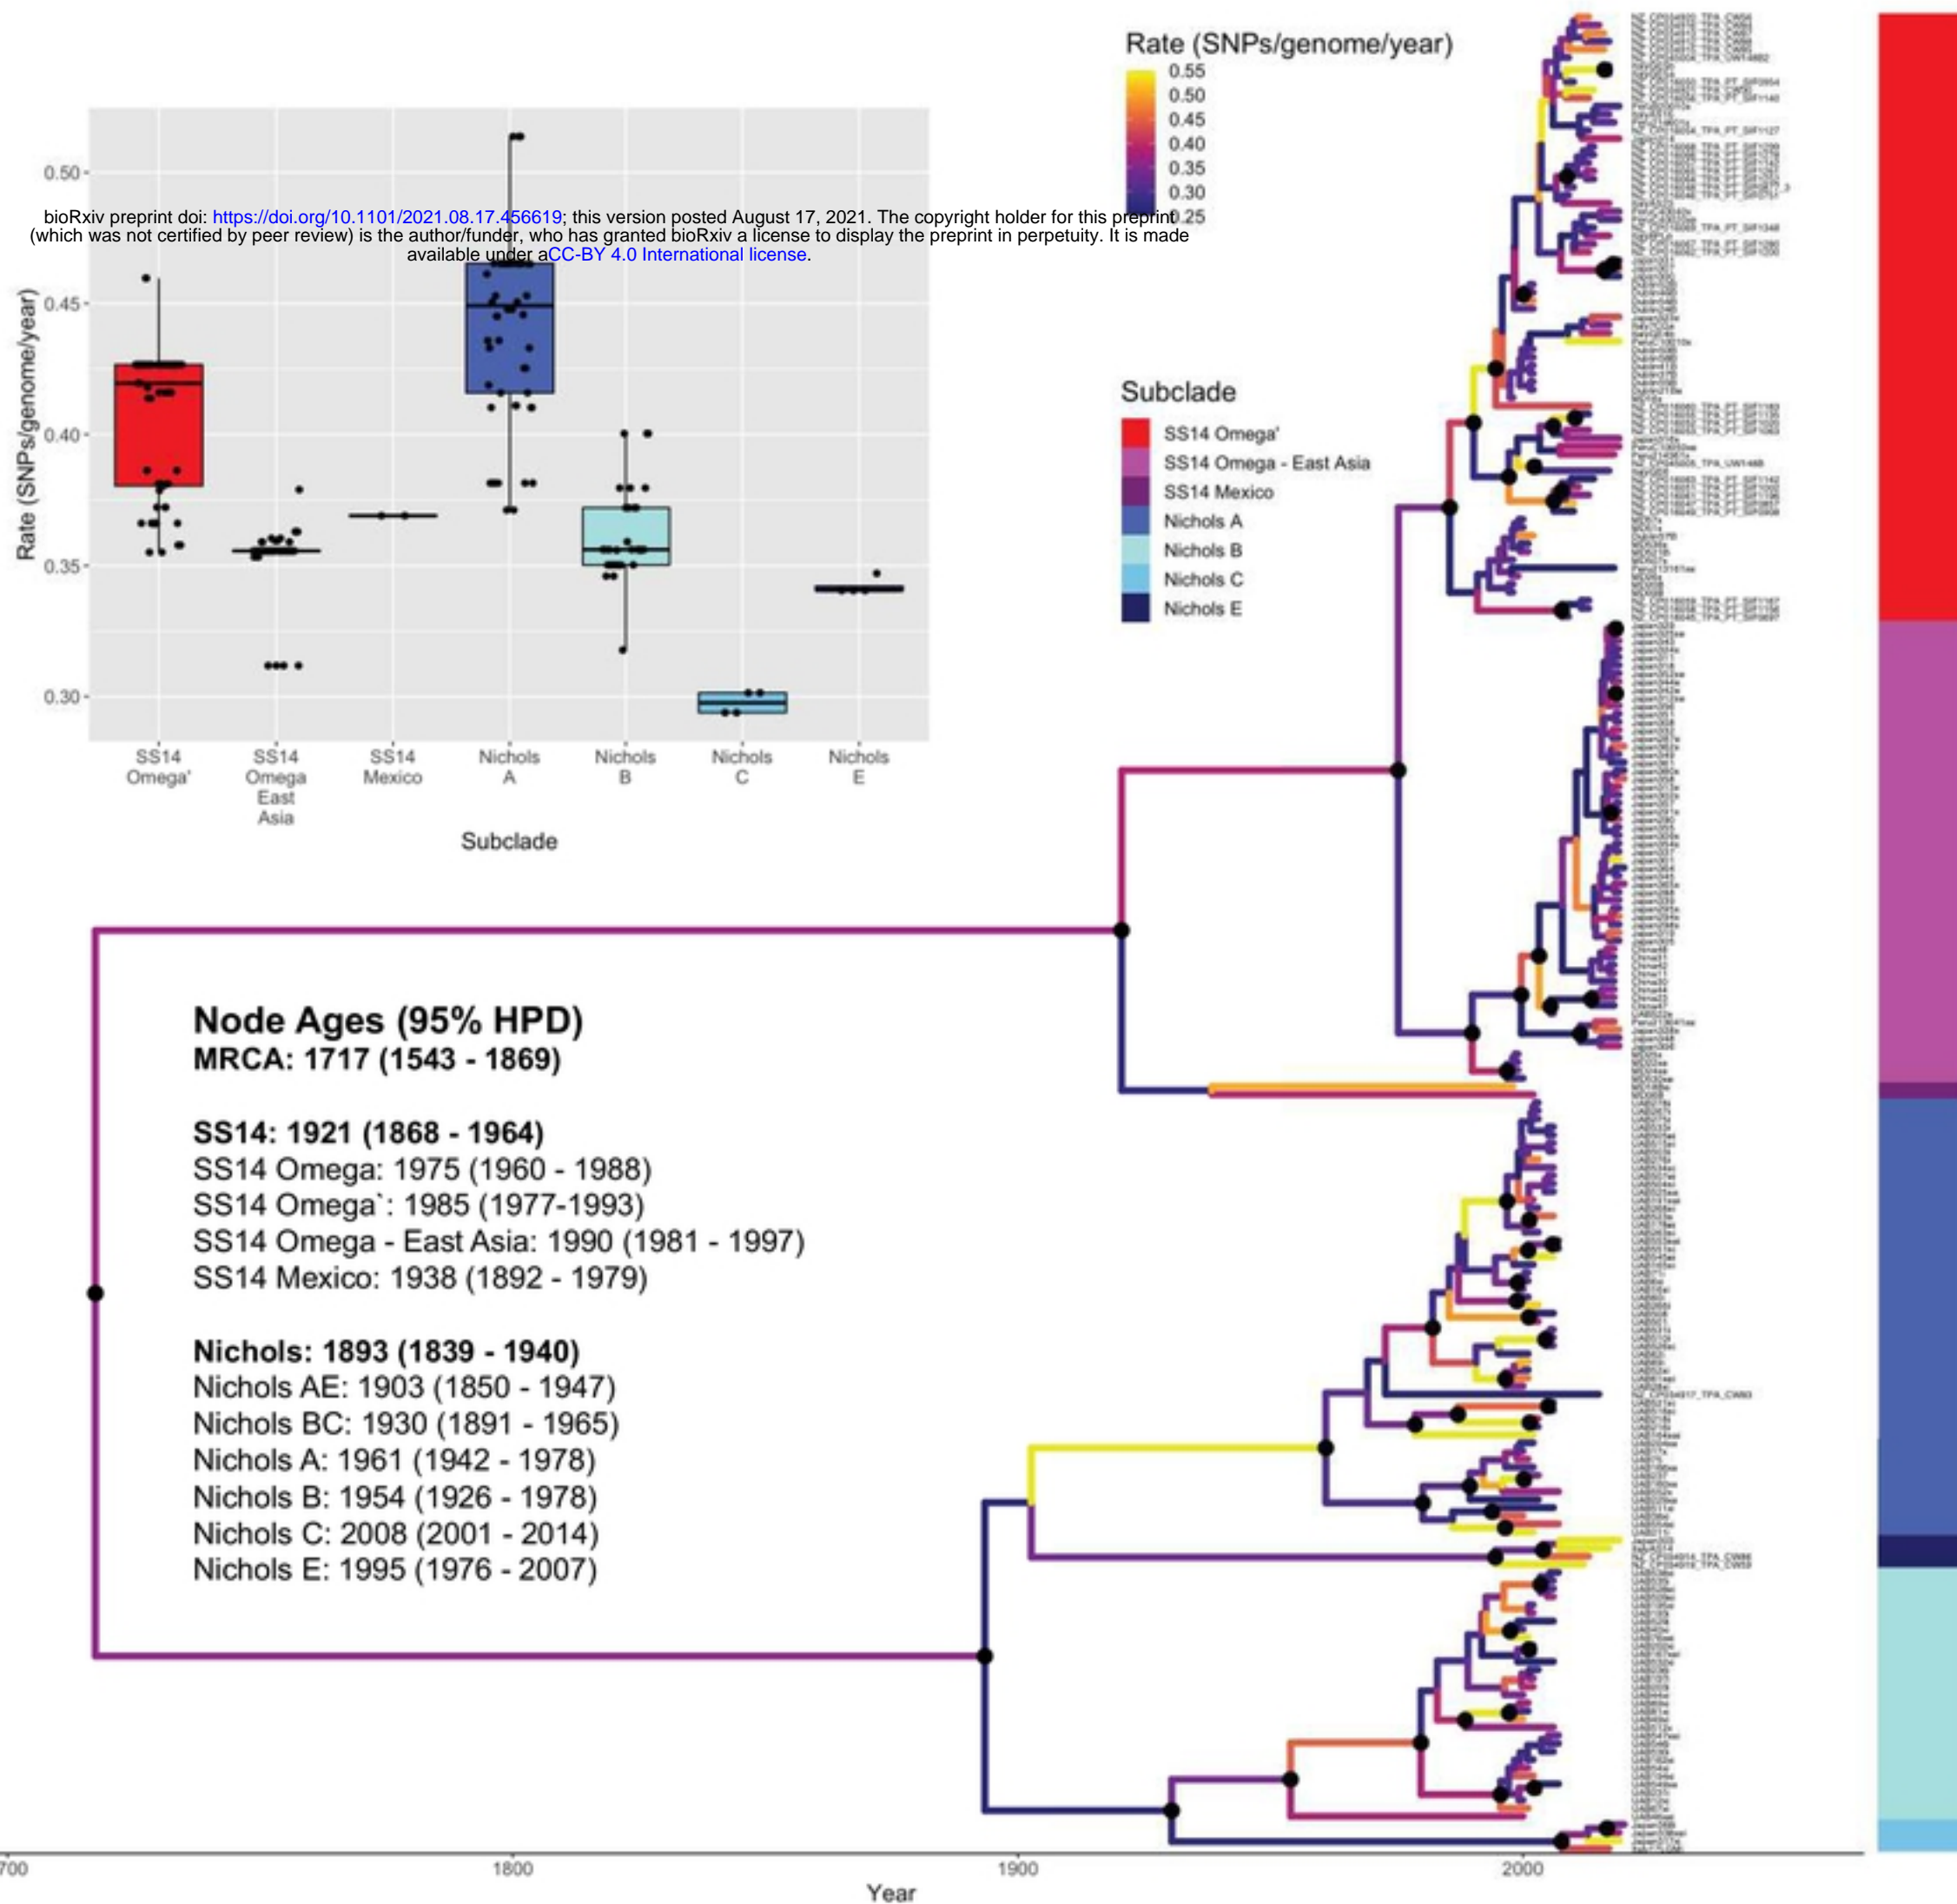

Figure 3

A

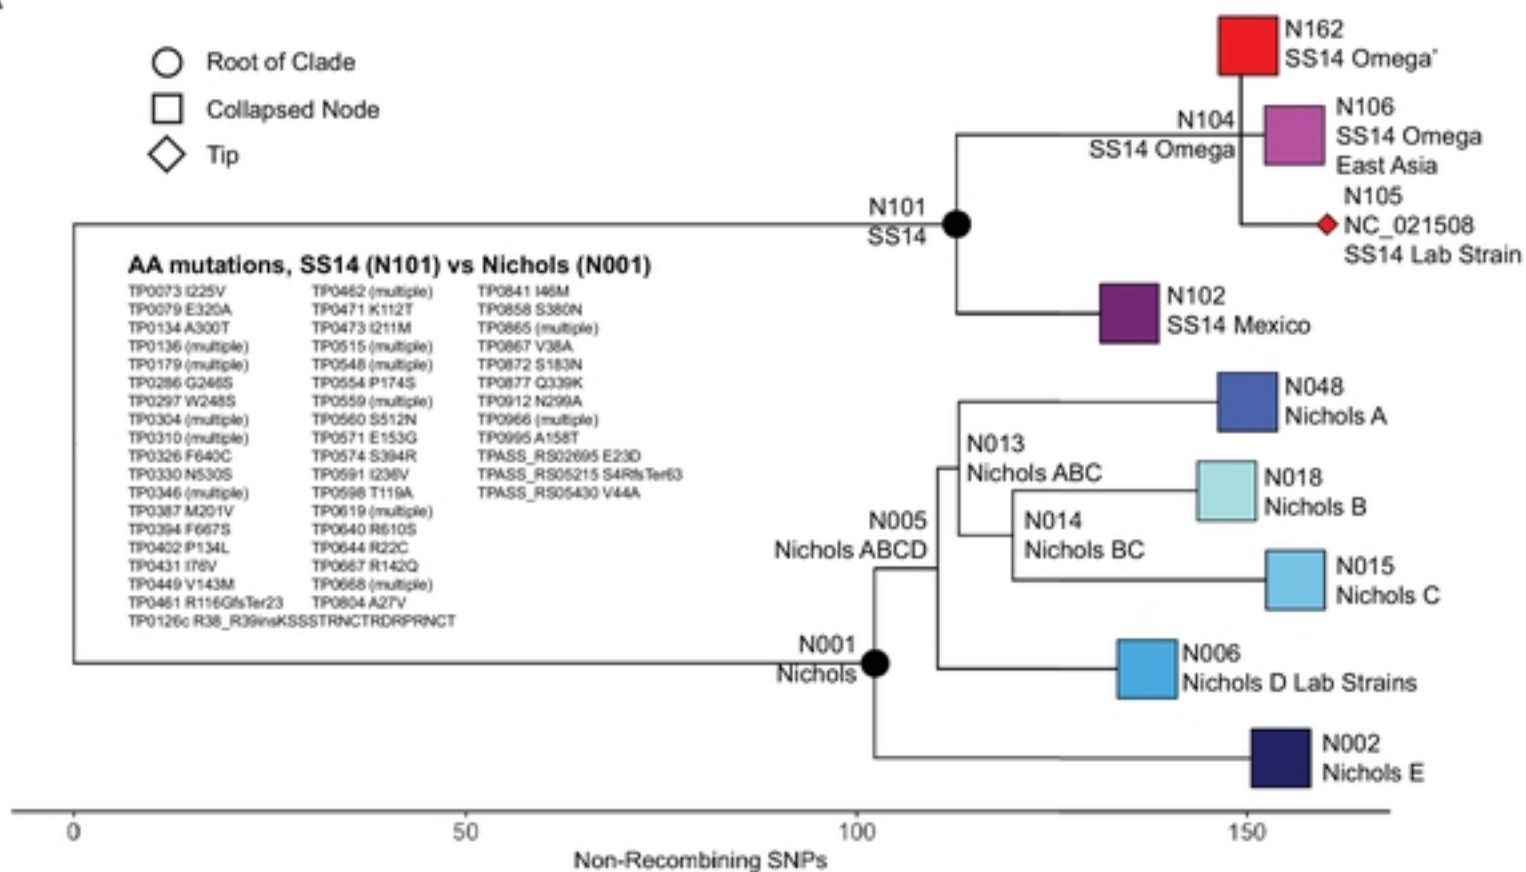

B

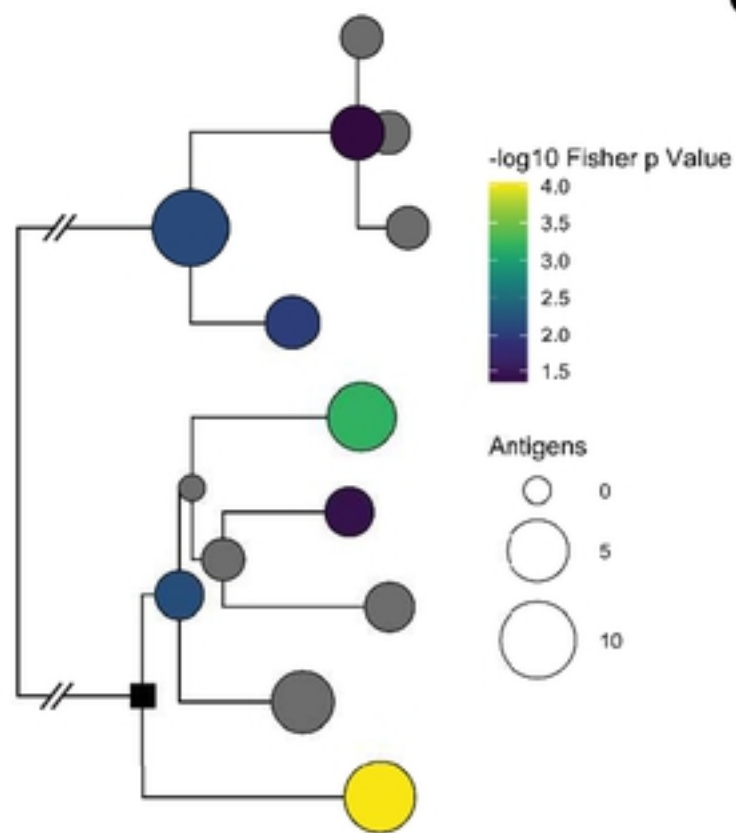

C

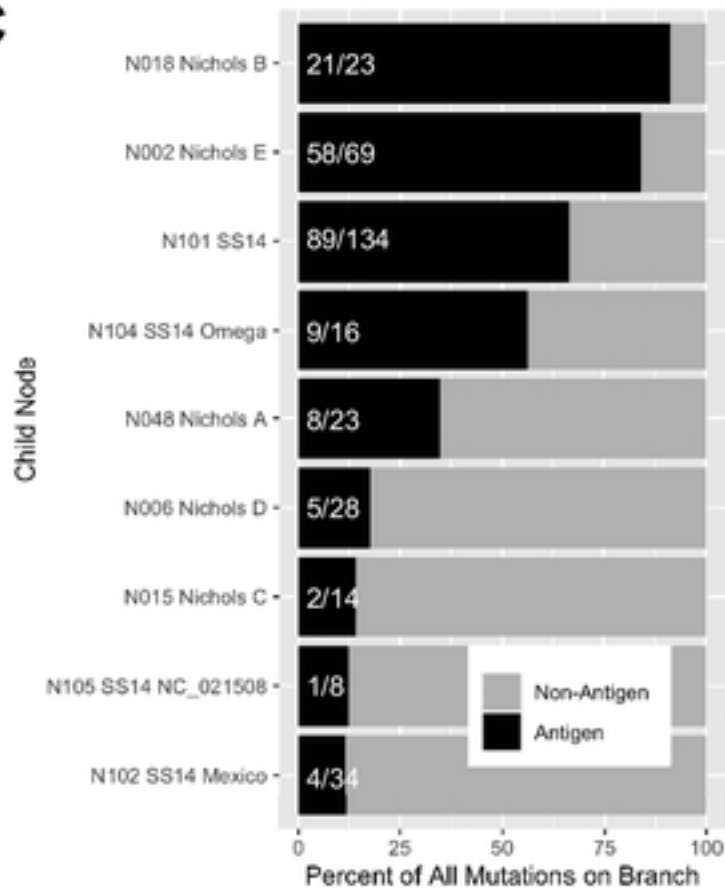

D

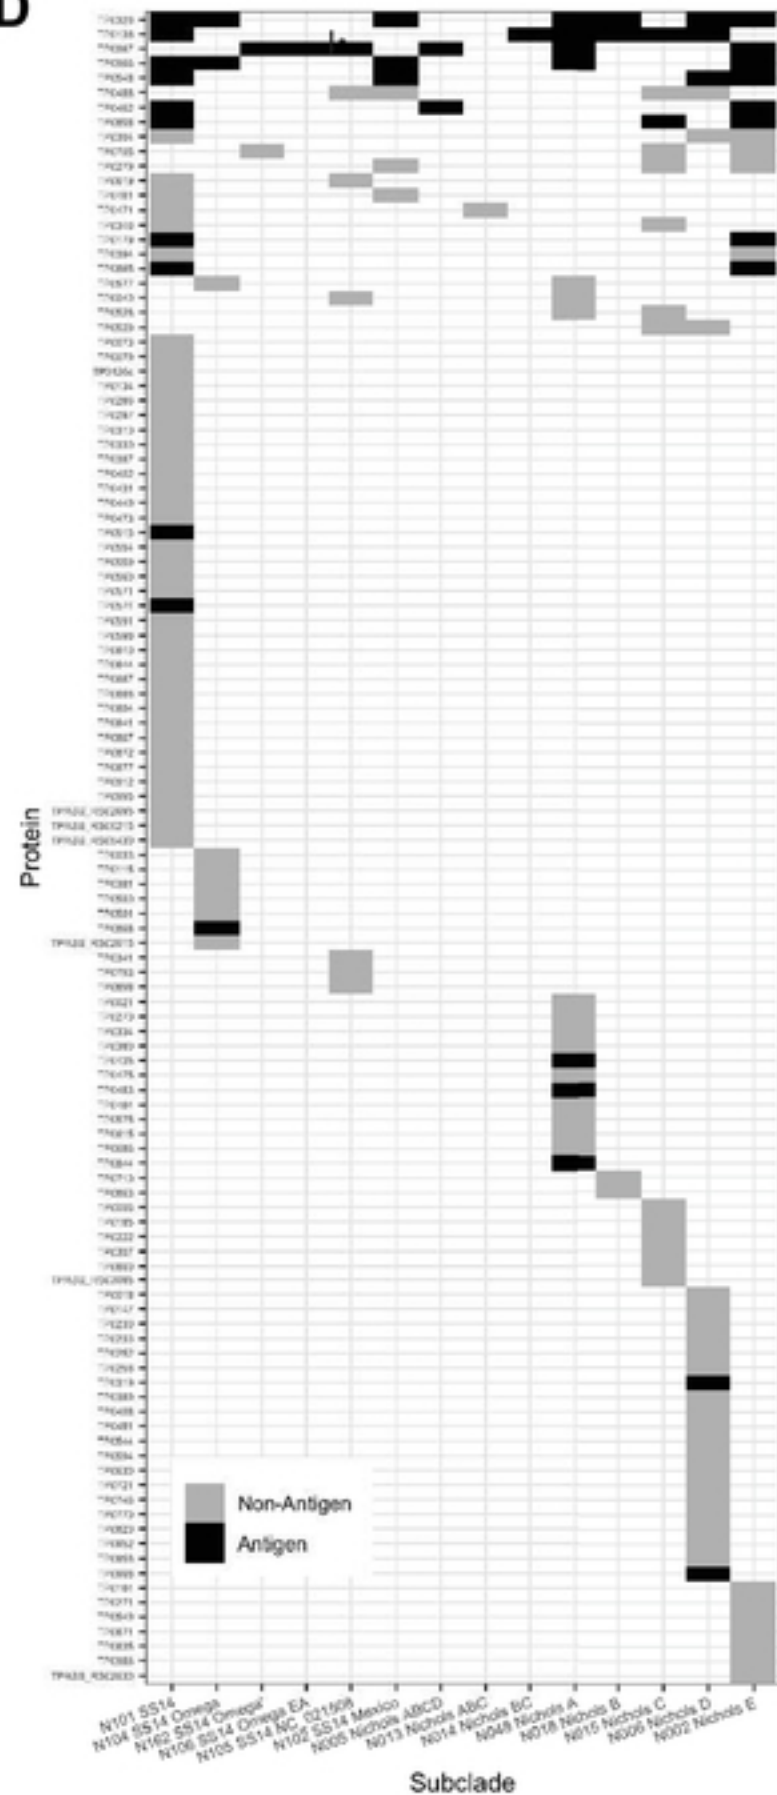

Figure 4



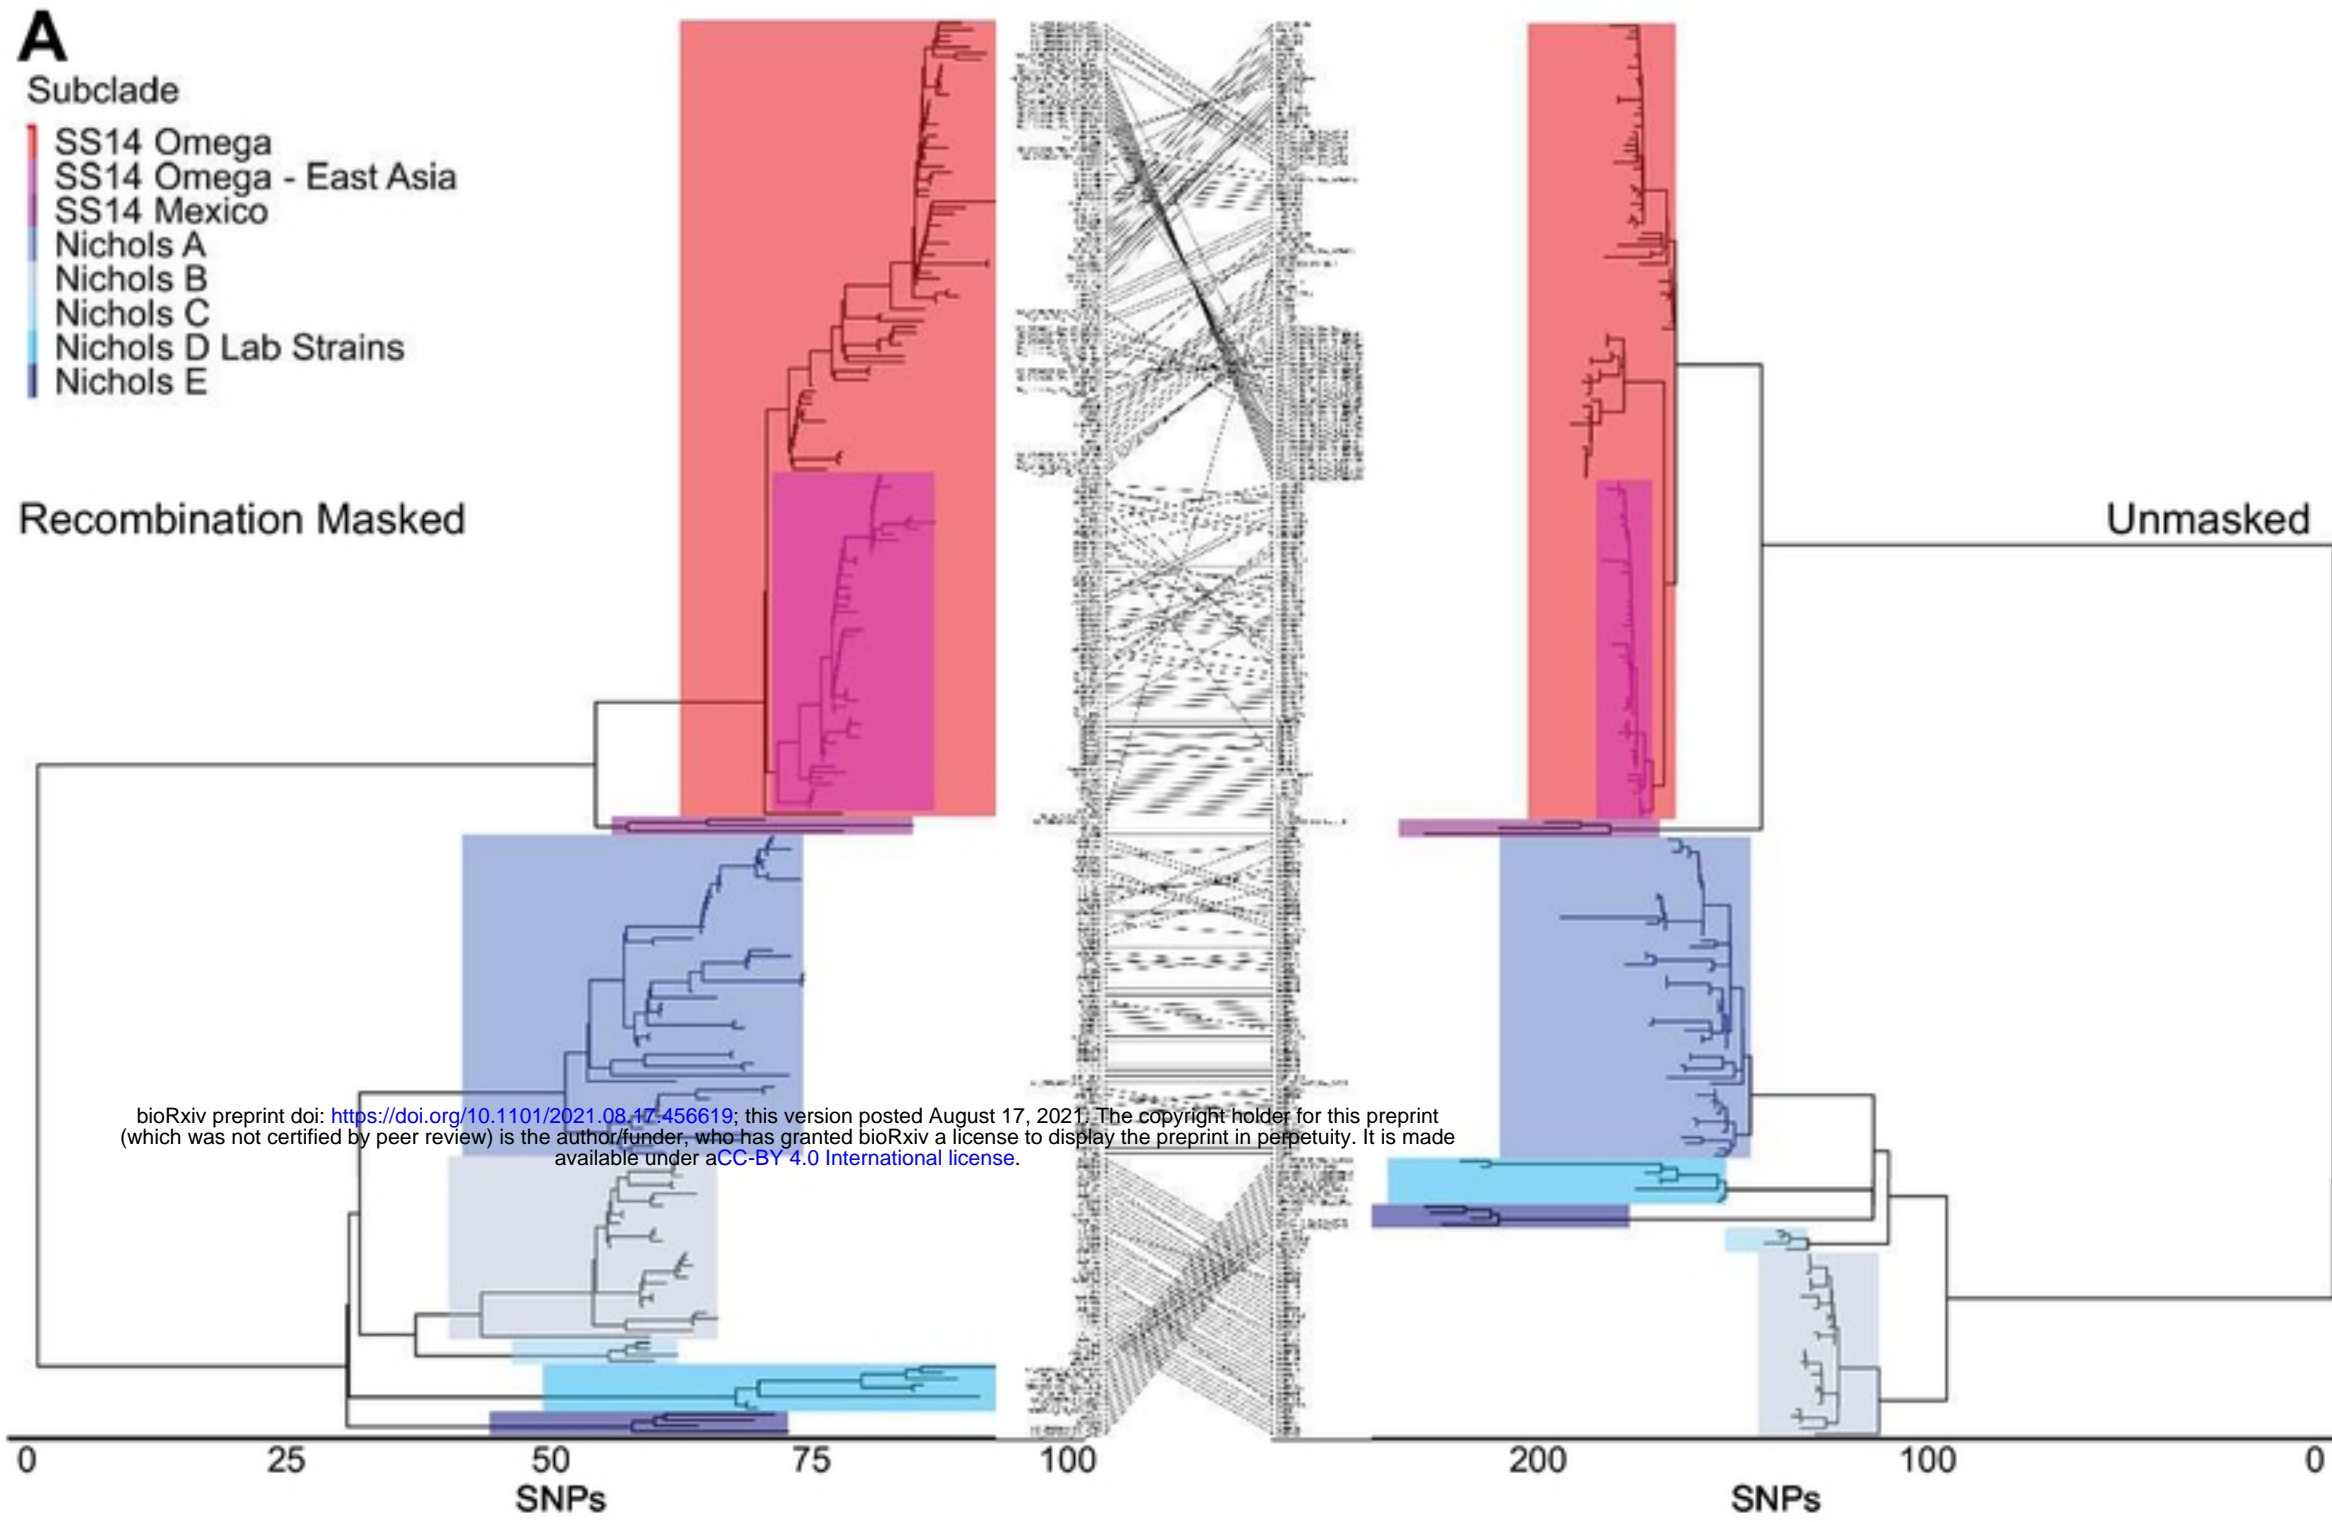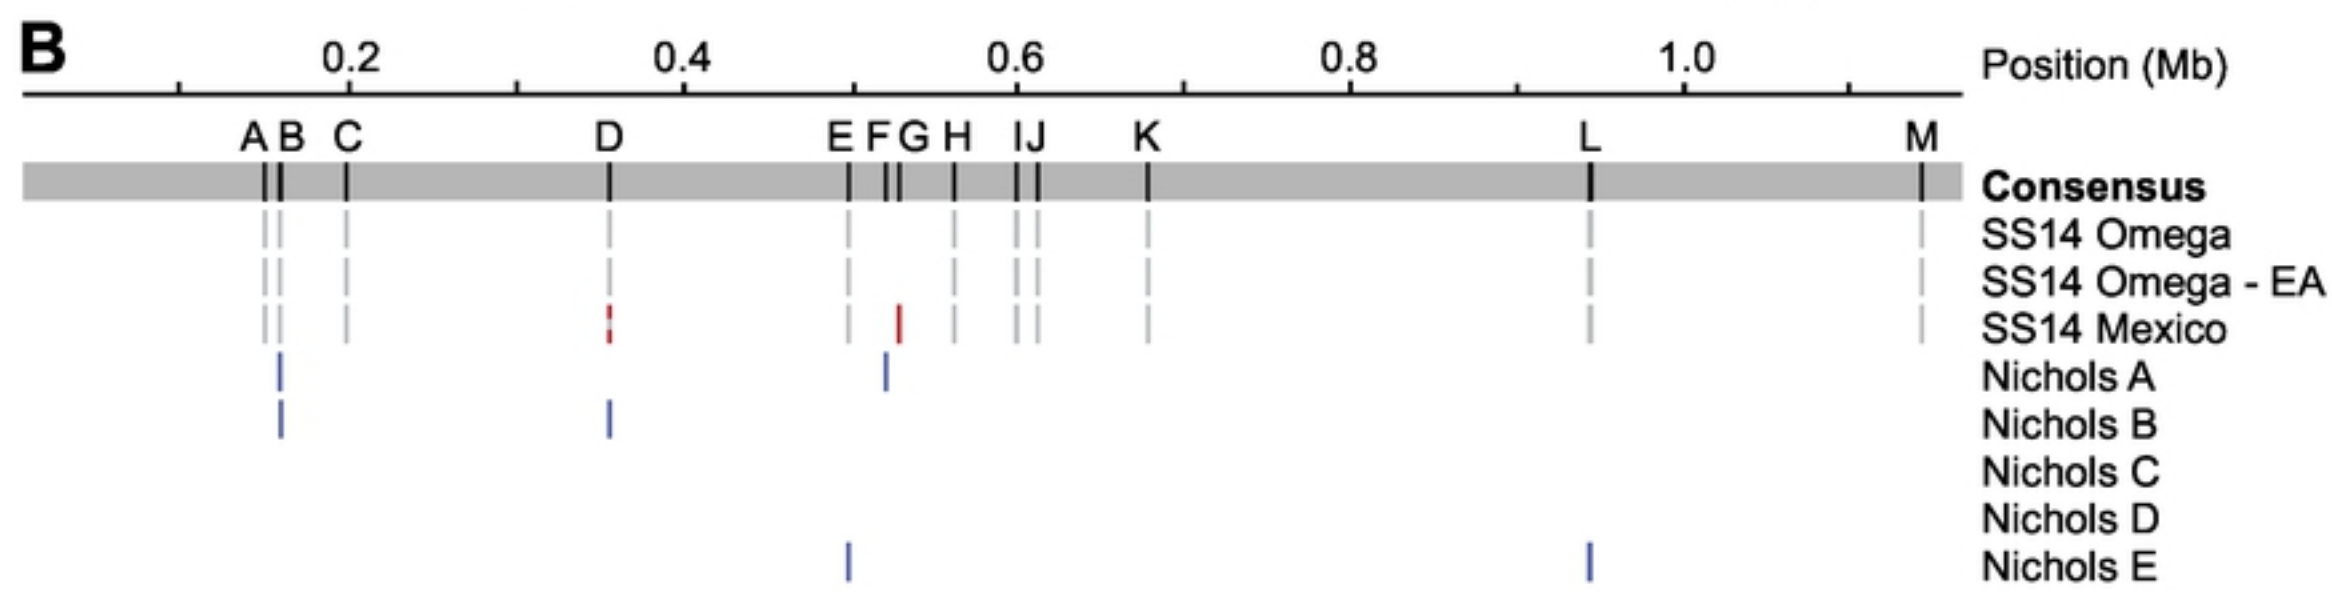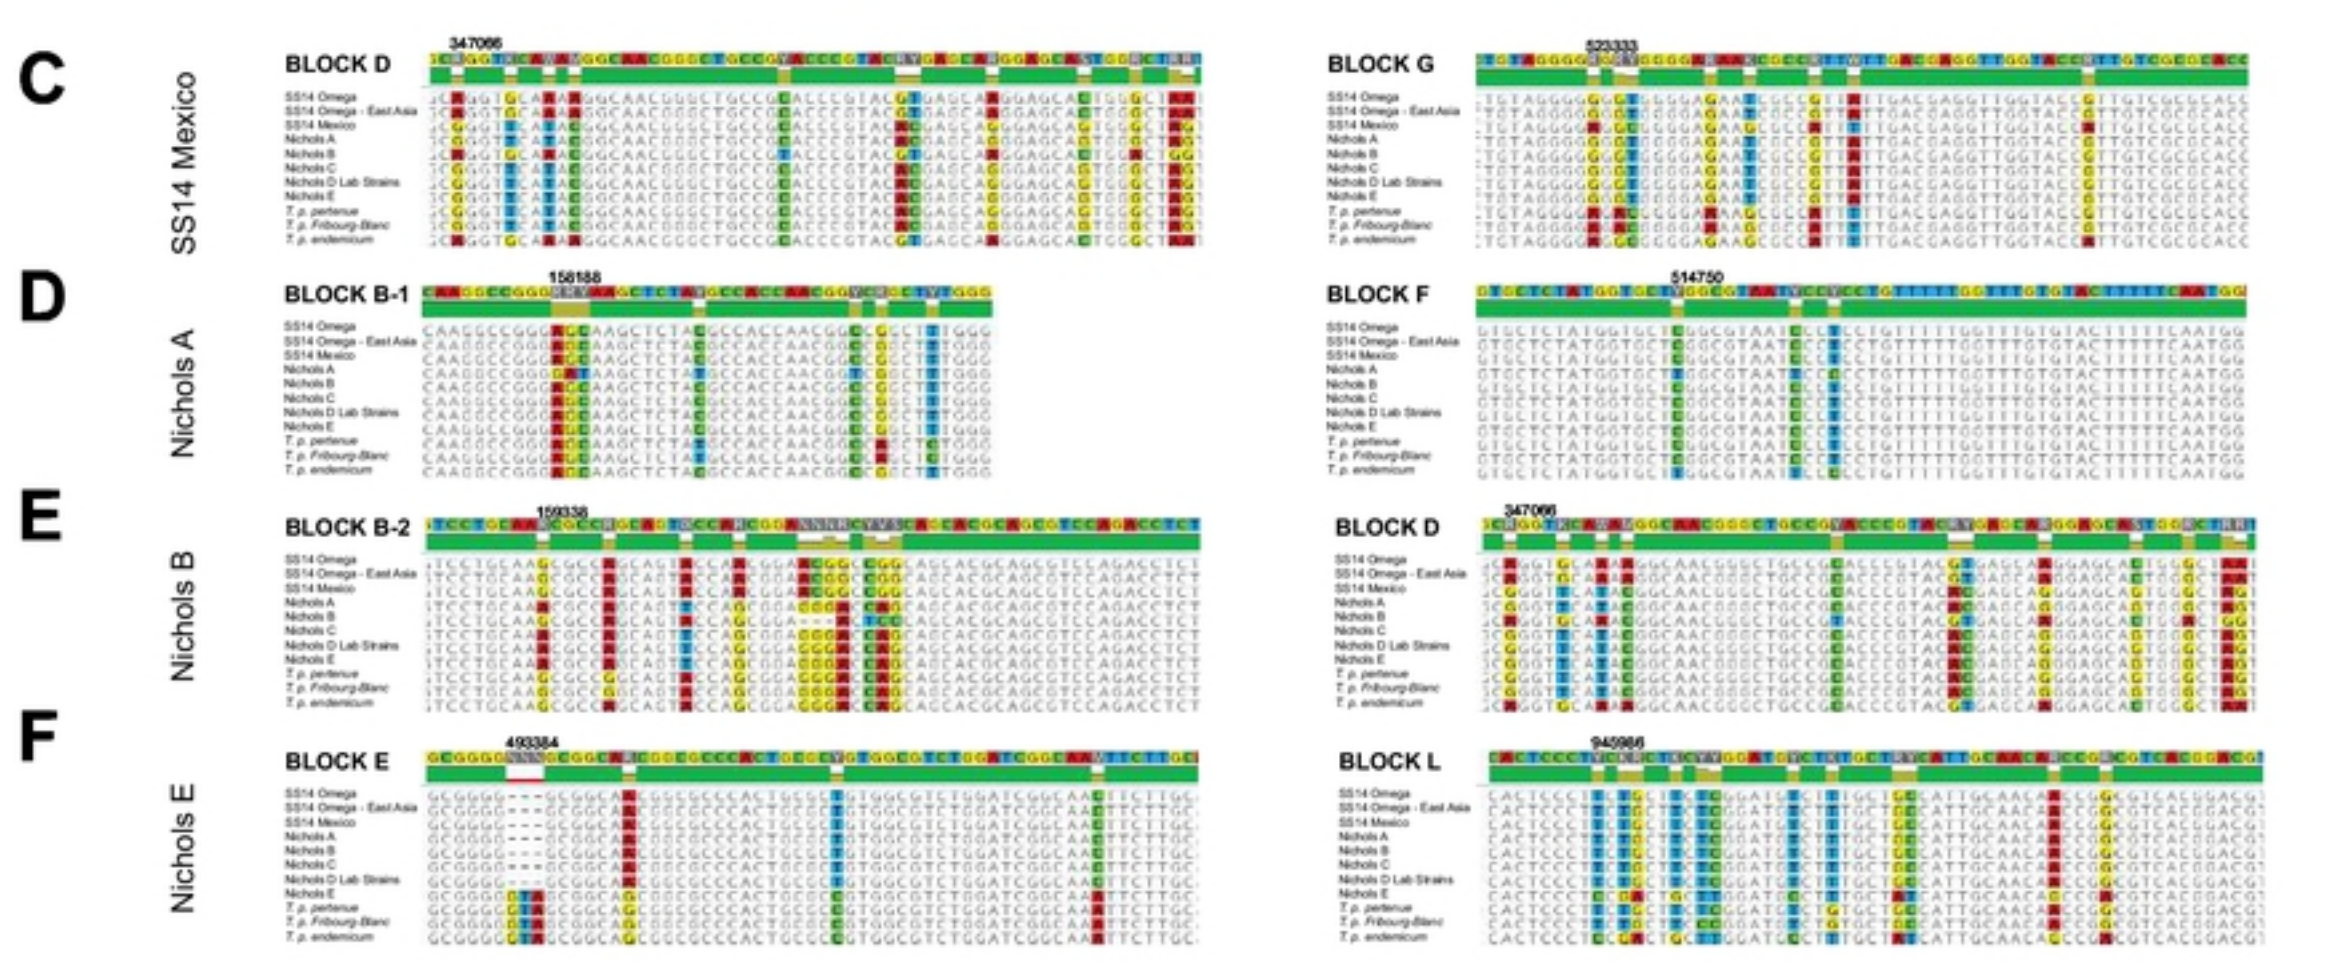

Figure 2
